# Supplementary material for: Flow-Seq Evaluation of Translation Driven by a Set of Natural Escherichia coli 5′-UTR of Variable Length
Source: MDPI journal article supplement (doi:10.3390/ijms232012293), 2022-10-14
Supplement: s1 [file s1]

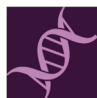

Supplementary information

# Flow-seq evaluation of translation driven by a set of natural *Escherichia coli* 5'-UTR of variable length

Ekaterina S. Komarova<sup>1</sup>, Anna N. Slesarchuk<sup>2</sup>, Maria P. Rubtsova<sup>2</sup>, Ilya A. Osterman<sup>3</sup>, Alexey E. Tupikin<sup>4</sup>, Dmitry V. Pyshnyi<sup>4</sup>, Olga A. Dontsova<sup>2,3,5,6</sup>, Marsel R. Kabilov<sup>4\*</sup> and Petr V. Sergiev<sup>1,2,3,6\*</sup>

<sup>1</sup> Institute of Functional Genomics, Lomonosov Moscow State University, 119992, Moscow, Russia

<sup>2</sup> Department of Chemistry, Lomonosov Moscow State University, Moscow, 119991, Russia

<sup>3</sup> Center for Life Sciences, Skolkovo Institute of Science and Technology, Skolkovo, Moscow region 143025, Russia

<sup>4</sup> Institute of Chemical Biology and Fundamental Medicine, Siberian Branch of the Russian Academy of Sciences, Novosibirsk, 630090, Russia

<sup>5</sup> Shemyakin-Ovchinnikov Institute of Bioorganic Chemistry, Russian Academy of Sciences, Moscow 119992, Russia

<sup>6</sup> Belozersky Institute of Physico-Chemical Biology, Lomonosov Moscow State University, Moscow 119992, Russia

\* Correspondence: petya@genebee.msu.ru (P.V.S.) and kabilov@niboch.nsc.ru (M.R.K.)

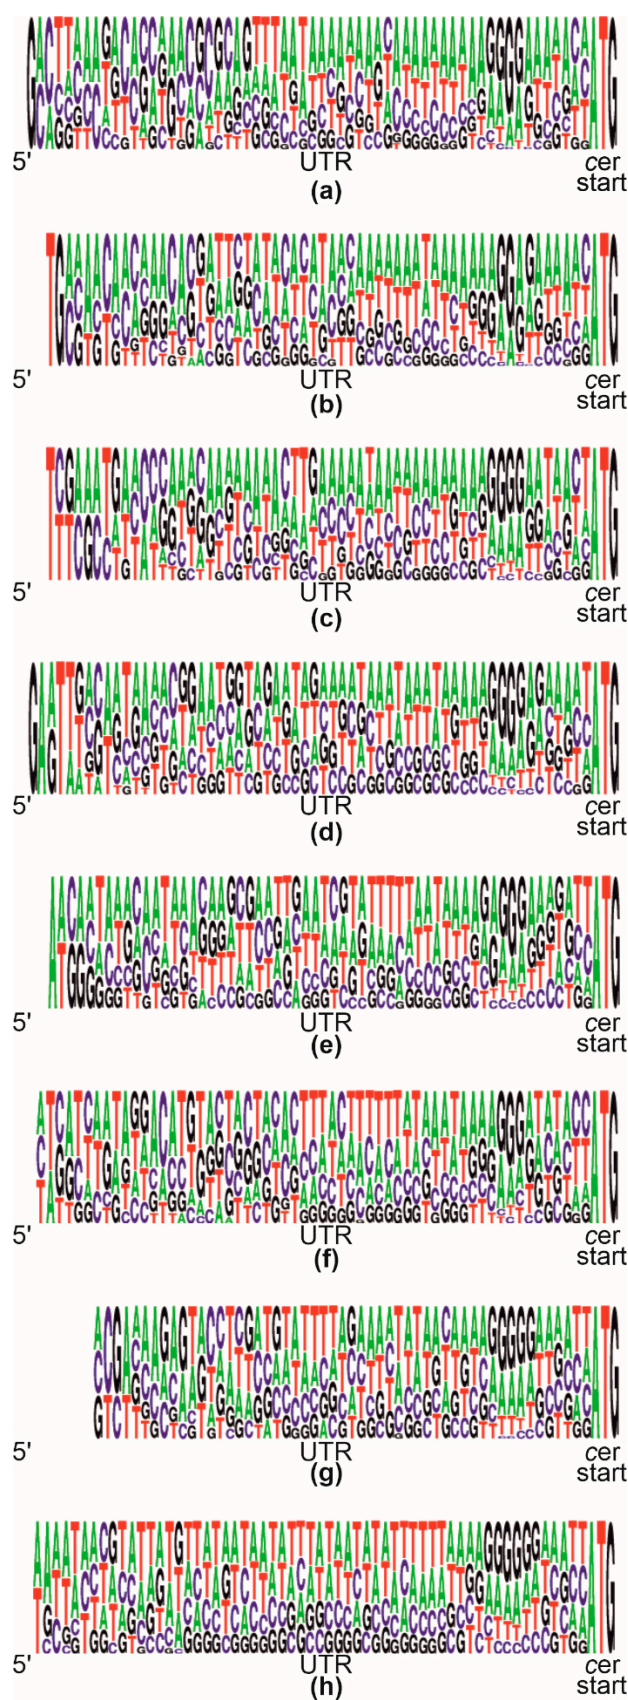

**Supplementary Figure S1.** Nucleotide composition of the 5'-UTR sequences sorted by translation efficiency shown as sequence logo [1]. (a-h) Bins from 1 to 8, ordered by increase in translation efficiency. The sequences are aligned by their 3'-edge (ATG start codon). Height of a letter represents an occurrence of particular nucleotide at particular position of the 5'-UTR.

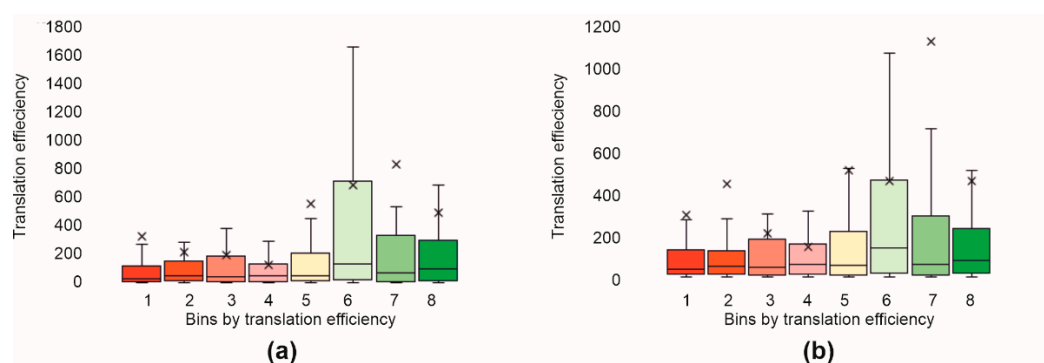

**Supplementary Figure S2.** Comparison of translation efficiencies observed by Flow-seq and those obtained by ribosome profiling. **(a)** Bins sorted by translation efficiency are marked below the bars. Y-axis corresponds to the translation efficiency determined by ribosome profiling in [2]. **(b)** The same as (a) for the ribosome profiling described in [3]. Quartile ranges are shown as solid bars (25% to 50%)

### Supplementary references

1. Crooks, G.E.; Hon, G.; Chandonia, J.-M.; Brenner, S.E. WebLogo: A Sequence Logo Generator: Figure 1. *Genome Res.* **2004**, *14*, 1188–1190, doi:10.1101/gr.849004.
2. Elgamal, S.; Katz, A.; Hersch, S.J.; Newsom, D.; White, P.; Navarre, W.W.; Ibba, M. EF-P Dependent Pauses Integrate Proximal and Distal Signals during Translation. *PLoS Genet* **2014**, *10*, e1004553, doi:10.1371/journal.pgen.1004553.
3. Kannan, K.; Kanabar, P.; Schryer, D.; Florin, T.; Oh, E.; Bahroos, N.; Tenson, T.; Weissman, J.S.; Mankin, A.S. The General Mode of Translation Inhibition by Macrolide Antibiotics. *Proc Natl Acad Sci USA* **2014**, *111*, 15958–15963, doi:10.1073/pnas.1417334111.
