# Supplementary material for: Flow-Seq Evaluation of Translation Driven by a Set of Natural Escherichia coli 5′-UTR of Variable Length
Source: Int J Mol Sci. 2022 Oct 14;23(20):12293. doi: 10.3390/ijms232012293 (PMC9604319; doi:10.3390/ijms232012293)
Supplement: Supplementary file 1 [file ijms-23-12293-s001.zip › SI Table S1.xlsx]

## Sheet: Лист1
Supplementary Table S1. Distribution of reads between the bins sorted by CER/RFP ratio	Percentage of reads corresponding to a particular variant in the total number of reads in bins 1-8
5-UTR	1	2	3	4	5	6	7	8		name	seq	length	bin assigned
1	0.0365525	0.0256736	0.0263303	0.020707	0.0186281	0.0307062	0.0419109	0.0107357		nemR	GC	2	7
2	0.245799	0.212688	0.18798	0.15617	0.147108	0.0601636	0.0136755	0.0787076		glnD	GCACA	5	1
3	0.000517201	0.000756856	0.000155888	0.000156209	0	0.0001374	0.00145145	0.000250049		yihX	CAAAA	5	7
4	0.154882	0.125992	0.0963381	0.132535	0.1136	0.067788	0.00113313	0		entH	GCATAAGC	8	1
5	0.000270659	0.000692528	0.0003069	0.00106449	0.000125909	0.000264017	0.00049833	0.000327617		mrcB	AGAAAAAGC	9	4
6	0.00701393	0.00336655	0.0447931	0.0637367	0.103749	0.221418	0.12654	0.0540255		gcl	AGGAATAAA	9	6
7	0.189985	0.189301	0.171617	0.166446	0.127464	0.0525906	0.0253365	0.000267393		yhcB	GAGATGTTC	9	1
8	0.0201083	0.0431322	0.0497377	0.0555803	0.0356513	0.0129816	0.00692575	0.000784835		ydiU	AGGAGGATCT	10	4
9	0.102812	0.162329	0.126872	0.126257	0.168949	0.0465395	0.0103233	0.000500098		dusC	GGGTGATGAT	10	5
10	0.419969	0.328181	0.356255	0.347893	0.234018	0.0403673	0.0607047	0.0177381		radD	ACGCGAGACC	10	1
11	0.0950311	0.11562	0.149379	0.102852	0.0549982	0.000654652	0.000445278	0.00042253		ytjB	AGGGTGGAAG	10	3
12	0.000541319	0	0	7.81045e-05	0	0.000475508	0.000306973	0.000327617		lpxD	TTAAATAAGTA	11	1
13	0.00212687	0.0134011	0.018229	0.00658094	0.00659029	0.00382563	0.00318718	0.000172481		yaeQ	GGAGTTTTCTT	11	3
14	1.31554	0.93486	0.527336	0.288867	0.148864	0.0702828	0.0408216	0.000267393		insA-5	GAGGTGCTCCA	11	1
15	0.16585	0.111195	0.124091	0.113814	0.123912	0.195815	0.574775	0.423839		ackA	TAGGTACTTCC	11	7
16	0.00111658	0.0123853	0.00299108	0.00426678	0.000683733	0.000686998	0	0.000172481		bdcA	AAGGAGTCCTT	11	2
17	0.143228	0.115217	0.213239	0.105959	0.119668	0.0657309	0.0349456	0		comR	TACAACGGCATC	12	3
18	0.159821	0.462032	0.526932	0.62931	0.546961	0.426399	0.0564923	0.228106		dicB	GAGGACGCGATA	12	4
19	0.313032	0.196503	0.125728	0.0881751	0.0185516	0.0942603	0.062226	0.0295872		rsxA	TCAGGCCGAAAA	12	1
20	0.205384	0.169862	0.392577	0.24412	0.160795	0.152884	0.198384	7.75683e-05		sthA	GTAAGCCCTACC	12	3
21	0.0872632	0.0627135	0.174018	0.163842	0.243406	0.253025	0.264819	9.49123e-05		infB	AGGAAGGAACAGC	13	7
22	0.0230954	0.0578833	0.112541	0.0713914	0.0960206	0.11336	0.018136	9.49123e-05		rplT	ACAGGAGAGCACAT	14	6
23	0.485791	0.272072	0.25373	0.188622	0.087454	0.0388855	0.060206	0		bioH	GAGAACAATAGCGG	14	1
24	0.082453	0.0367207	0.0251075	0.0751405	0.0386875	0.00578157	0.00172439	0		pepQ	CAGAAGGGTAAAAA	14	1
25	0	0	0.0001023	0.000390522	0.000229504	0	0.000180013	7.75683e-05		pmbA	AAACTCTCTACATT	14	4
26	0.0120939	0.0284087	0.00519785	0.0340276	0.0258209	6.33088e-05	0.000106106	0		rutA	GCGGCTGAAAAGGAT	15	4
27	0	0	0	0	0	0	7.39074e-05	0		puuC	GAAACAGGAGTCATA	15	7
28	0.000246542	0.00225469	0.00562168	0.000979667	0.0164016	0.00325585	0	0		lrhA	AGTAAGTGATAATAT	15	5
29	0.0419371	0.0464161	0.0363314	0.0694652	0.00608665	0.000412199	0.00151401	0.000189825		bcsE	AGACAAAATGGTGAC	15	4
30	0.00421979	0.0046706	0.0736955	0.0492336	0.102522	0.117209	0.069042	0		cdaR	GCATAACGGAGGACTT	16	6
31	0.0432377	0.0624904	0.0141273	0.0120596	0.00715289	0.0180654	0	0		dgcC	GGAAAATTGTTTCTGA	16	2
32	0.0926085	0.148347	0.099222	0.145891	0.056455	0.0295517	0.000159159	0.000387842		fetA	GAAAAAGGGAACAGCG	16	2
33	0.0106585	0.0270094	0.0790639	0.0145879	0.046352	0.0212538	0	0.000232705		ybiT	TTTTCAGGATACGCCT	16	3
35	0.0156179	0.0432274	0.0593734	0.0547635	0.0782228	0.0897327	0.123621	0		nimT	TAACAATGAGAAGCAT	16	7
36	0.505867	0.740776	0.561402	0.283074	0.160202	0.040735	0.0405183	0.146202		ung	TTCGCAGGAGAGCGAG	16	2
37	0.0346096	0.0417121	0.0235389	0.000823458	0.000306006	0.00181854	0.000233066	9.49123e-05		rppH	ATTTTGAGGTAGTCCG	16	2
38	0.0906558	0.137187	0.0636846	0.0512845	0.0914576	0.00966248	0.000740907	0.000155137		arsR	CAATCAGGAGCGCAAT	16	2
39	0.0744002	0.111094	0.0845443	0.0785502	0.101506	0.0798939	0.00111044	0.0395819		cpxR	CGGAGGTATTTAAACA	16	2
40	0.00288078	0.0394757	0.0436873	0.0685528	0.0219384	0.0080311	0.00800583	0		yccF	CAGTAAAGCGAGGTTTT	17	4
41	0.0293456	0.200112	0.214164	0.151555	0.0312238	0.0114473	0.0139217	0		ymdB	AGGTGTAAGGAGGCGTT	17	3
42	0	0	0.0001023	0	0	0	0	0		flxA	TTTAAAAGGAGAAATCT	17	3
43	0.00035284	0.0392811	0.0406085	0.0817928	0.0587229	0.117862	0.0143974	9.49123e-05		nadC	GCTATCTGGAGTTTTAAC	18	6
44	0.147322	0.215041	0.153977	0.122477	0.0418989	0.00173367	0	7.75683e-05		dinB	AGTGTTGAGAGGTGAGCA	18	2
45	0.111431	0.0818478	0.101955	0.0201938	0.0284873	0.0396654	0.00569786	0		appA	AAAAGCGGAAACATATCG	18	1
46	0.0206639	0.144852	0.0934591	0.109596	0.106198	0.020443	0	0.00130228		yebG	TATTATGAGAGGCTGCAA	18	2
47	0.252986	0.267864	0.23781	0.262175	0.101463	0.0140363	0.104512	0.0494032		norR	ATTGACAGTGAGGCAAAG	18	2
48	0.0776722	0.329231	0.381109	0.425961	0.449504	0.263793	0.0345801	0.00281172		yicR	ACCACAAAGGAGGTGAAG	18	5
49	0.0137179	0.00425126	0.0689994	0.119761	0.236337	0.383019	0.438389	0.00194017		creD	ATTGCAAAGGAGAAGACT	18	7
50	0.138799	0.162392	0.0937563	0.0510388	0.0205805	0.0248262	0.029183	0		cynR	ATTTACTTATAGGTTGCGA	19	2
51	0.00853159	0.0341602	0.133327	0.239601	0.215524	0.0601434	0.00815365	0.000767491		cusR	GGCAACATGCGGAGGAAAT	19	4
52	0.00389107	0.0237548	0.0223259	0.0324676	0.0103548	0	0	0		yncG	AAAAGATTGTGAGGGGCAT	19	4
53	0.00174008	0.013513	0.0404186	0.0184419	0.0595389	0.010305	0.0139766	0		alkA	GGATGAATAAGGAGATGCG	19	5
54	0	0	0.0002046	0	0	6.33088e-05	0	0		frlR	CTTTATTTCAGGGTCGATT	19	3
55	0.000952222	0.0148973	0.0571618	0.145092	0.213105	0.505986	0.180435	0.0021218		btuE	GACCACACCCAGGAGAAACG	20	6
56	0.000845924	0.000177102	0.0393517	0.0423672	0.370111	1.16921	1.02115	0.945704		yefM	GTACAAAAGAGGAGATTGAC	20	6
57	0.0114508	0.000918078	0.00252342	0.00278279	0.0123885	0	0	0		hemF	ATTCGAAAAAGCGATAAGTT	20	5
58	0	0.000531306	0.0203968	0.0461451	0.0976096	0.295471	0.512751	1.91375		pheL	AGTCACTTAAGGAAACAAAC	20	8
59	0	0.00115951	0.00227011	0.00211554	0.0599772	0.180325	0	0		hypA	AATAGTTAATGGGAGGCGAT	20	6
60	0.742746	0.586281	0.321424	0.22125	0.187864	0.0711824	0.0695805	0.077837		speC	CCCGAAACGGGTTTGCGCTT	20	1
61	0.903678	0.677528	0.44743	0.347331	0.219309	0.248998	0.0542963	0.158278		yibF	CCTCGCACAAAGGACTCGGC	20	1
62	0.144354	0.254707	0.224058	0.223585	0.164284	0.0397273	0.000930431	0		mioC	CTTAATAAAGGTGGCGGTTT	20	2
63	0.000952222	0.00328554	0.091983	0.109478	0.500436	1.32715	0.81769	0.789981		yihD	CAAGAGTAAGGAGCATCACT	20	6
64	0.124158	0.433782	0.431305	0.296015	0.288371	0.0674173	0.0292799	0.000612354		yafZ	CCCGTTATGAGGAGTCTGCTT	21	2
65	0	0.000112775	0	7.81045e-05	0	0	0	0		yajR	GAATTTAAAACAGAGGTGGTA	21	2
66	0.0438371	0.287065	0.377504	0.221739	0.241107	0.0525218	0.0306176	0.000155137		ybjC	TCACTTTGCAGAGGGAAGCGT	21	3
67	0.0159269	0.0169264	0.0285517	0.00365538	0.022442	0.0267161	0.00654304	0		pepT	ACAAAAAGTGAGGGTGACTAC	21	3
68	8.21806e-05	0.000112775	0	0.00849577	0.0118705	0.0216809	0.0253782	0.0273131		pgpB	ACTTATCAAAAAGGAGAGGCC	21	8
69	0.0200547	0.000531306	0.0150869	0.00858269	0.01148	0.00146965	0	0		rstA	TTTATATCTACCGTGAATGTT	21	1
70	0.00838152	0.0114029	0.0227205	0.0756582	0.0283486	0.00863461	0.000306973	0		selD	TTGCATTGACAGGAGATGTCC	21	4
71	0.694782	0.499489	0.3786	0.425298	0.134227	0.0797471	0.0102648	0.135115		loiP	ACCTTGTGCGGAAGAGAAAAC	21	1
72	0.226257	0.194138	0.160758	0.0813712	0.0974916	0.00738862	0.0205464	0.362043		rplM	TATTTATTGGGTAAGCTTTTA	21	8
73	0.294136	0.35632	0.396153	0.286802	0.285375	0.0560618	0.00867283	7.75683e-05		zraS	GATGAGCAGGCAAAGAAGAAG	21	3
74	0.0240137	0.038363	0.111605	0.306129	0.307877	0.0673192	0.0304548	0.000387842		acrZ	ATGACTATATCTGGAGTTGACC	22	5
75	0	0	0	0	0	0	0	0		dinI	GTATATTCAACAGGGGGCTATT	22	1
76	0.18964	0.193735	0.144302	0.129743	0.0721792	0.0473653	0.00795862	0		flgA	GTAGAAATGGCTGGGGGCGAAA	22	2
77	0.490036	0.680455	0.540932	0.502864	0.106651	0.0319818	0.0225002	0.12307		rssB	AAAGCCAGTCAGGGGAGAGAAC	22	2
79	0.410315	0.463178	0.373106	0.217262	0.0233664	0.0818957	0.0611404	0		sutR	TCCGTTTTGCCGGAGGAGTCGC	22	2
80	0.458381	0.212351	0.214262	0.0956131	0.0084837	0.0165607	0.0032384	0		yecR	CTCTTACTCTTCTGGCTGGACC	22	1
81	0.119673	0.0746509	0.100338	0.128118	0.0589046	0.0347378	0.0223655	7.75683e-05		ada	ATCCTTAACCAGGGAGCTGATT	22	4
82	0	0	0.00700517	0.00419539	0.041534	0.14587	0.204933	0.0192128		yfaY	ATAACAAAAGCAGGAGATAACC	22	7
83	0.266942	0.181573	0.155989	0.102232	0.0106656	0.00148983	0.00388455	0		patZ	GTCACTTCTGCGGGAGACCGGT	22	1
84	0.766325	0.633849	0.608875	0.77946	0.540354	0.209107	0.0963228	0.187185		ygbA	ATCTTAATGAGGTGGAGGCAGC	22	4
85	0.753713	0.672616	0.346011	0.220465	0.0488797	0.0254311	0.0444164	0.0133832		pabA	GTTCTTTTGTACCGGAGCCGCC	22	1
86	0.00149354	0.0618772	0.223917	0.210922	0.242116	0.114959	0.00499683	0.00115533		soxR	TTAACTTGAGGTAAAGCGATTT	22	5
87	0.190467	0.186023	0.159029	0.278147	0.311141	0.020292	0.0264338	9.49123e-05		melR	ATTCCAGGAAAGAGAGCCATCC	22	5
88	0.742288	0.568007	0.468055	0.323891	0.0698204	0.0420039	0.0822744	0.00399259		fumB	ACAGAGTTACAGGCTGGAAGCT	22	1
89	0.169541	0.330228	0.663606	0.988709	0.435794	0.182409	0.0232864	0.00211265		yjdC	GGGAAAGACGGAGGAAAATAGC	22	4
90	0.0567135	0.058448	0.446202	0.639629	0.936237	1.09288	0.432119	0.233744		holD	CTGACAACAGGAGCGATTCGCT	22	6
91	0	0	0	0	7.65014e-05	7.40908e-05	5.30529e-05	7.75683e-05		polB	TGGTTTTTTGATGGATTTTCAGC	23	8
92	0.000164361	0.000177102	0.000258188	0.000787766	0.00020241	0	0	7.75683e-05		yacC	TCTTTAAGCCCCTGGTAGAAGCA	23	4
93	0	0	0.0001023	7.81045e-05	7.65014e-05	6.33088e-05	0	0		malZ	ATTTTCATCACAGGGGAATTATG	23	3
94	8.21806e-05	0	0	0	7.65014e-05	0	0	7.75683e-05		grxA	ATAAATCTATGAGGAGAGAAATA	23	1
95	0	0.000177102	0.0154182	0.0386983	0.105912	0.10078	0.00100617	0		solA	ACCATGAGAGCAGAGAGAAAAAA	23	5
96	0.0721813	0.0534073	0.0534107	0.0683811	0.0174599	0.00034889	0.00110093	0.00059501		tqsA	AGGAAGAAAAAACGGGGACAAGC	23	1
97	0.336985	0.305957	0.0852604	0.111732	0.00854745	0.00654265	0.0135259	9.49123e-05		uidR	TTCACGCTAACTATAATGGTTTA	23	1
98	0.0416325	0.260974	0.293862	0.226131	0.189929	0.0122999	0.0302484	0.0147192		cho	ATAACCAGCATTCGGAGTCAACA	23	3
99	0	0	0	0	0	0.000264017	0.00293143	0.00842506		mprA	GAAATTAATGAGGTCATACCCAA	23	8
100	0.439655	0.975791	1.21775	1.25926	1.3523	0.424127	0.534481	0.00405282		argP	TTTACCAGGAGCAGACAACAGCA	23	5
101	0.0290553	0.132245	0.296697	0.312097	0.2599	0.0613839	0.149643	0.000732803		mscL	GTCGGCTTCATAGGGAGAATAAC	23	4
102	0.0605376	0.0396846	0.0829951	0.0876573	0.0432584	0.0215502	7.39074e-05	7.75683e-05		mutM	ATCTGTTCATTCCTGGAGATGCT	23	4
103	0.0650227	0.16164	0.200699	0.184157	0.0534873	0.0142263	0.00772372	7.75683e-05		cdh	CTTTGAGGTACAGGGAAAAAAAG	23	3
104	0.759889	0.939476	0.62306	0.520489	0.389316	0.125796	0.0119701	0.0296575		katG	ACACTGTAGAGGGGAGCACATTG	23	2
105	0.0967613	0.110293	0.0812122	0.106881	0.0363829	0.00854034	0.00592909	7.75683e-05		dcuS	AAATTTGTCACACAAGGAAGCTG	23	2
107	0.0678123	0.120001	0.0680884	0.0453574	0.0314166	0.0104949	0.00736736	0		purA	TAAGCAAACGGTGATTTTGAAAA	23	2
108	0.0188033	0.150777	0.00768231	0.0107965	0.00316685	7.40908e-05	0	0		ribF	GATTTTCACTGTTTTGAGCCAGAC	24	2
110	0.121002	0.402972	0.314955	0.32933	0.235088	0.0512313	0	0		hemH	AAGTTGAATCGATAAGAGGCGGTA	24	2
111	0	0.00144938	0.00972831	0.000156209	0.0026903	0	0	0		nadA	AAGCCTGTAAAACGAGATGGTAAG	24	3
112	0.515871	0.281618	0.142924	0.109197	0.0247674	0.0633993	0.0243398	0.000482754		ychO	TTATTACCGGAAGTTACCGACGTT	24	1
113	0	0	0	0	0	0	0	0		ynbA	AAACCGAATTATCAAGGATTGATA	24	1
114	0.00348999	0.000112775	0.0717324	0.0601595	0.0436362	0.0327321	0	0		sodC	GAATGCACAATGAACGGAGGTCCT	24	3
115	0.00544267	0.000177102	0.00757513	0.00086587	0.0669404	0.430874	0.767093	0.548703		ydjA	AATATCACGACAGGAGTTAATCAA	24	7
116	0.364653	0.172443	0.101984	0.0282789	0.0197071	0.0341249	0.0164419	0		nimR	AAATTATCGCTAAGTTCGGACAAA	24	1
118	0.00654943	0.0554364	0.22076	0.168214	0.262968	0.161357	0.327973	0.00355272		galF	ACCATTTTACAGGTGGATGAAATA	24	7
119	0.625114	0.866754	0.755974	0.889231	0.332904	0.192759	0.0711004	0.00625218		dapA	ACTTGTTTGCACAGAGGATGGCCC	24	4
120	0.000270659	0.0081658	0.0406037	0.0432956	0.0357214	0.0300919	0.00517501	0		rnlA	ATATGTTTCTATGGGATCCAGGAA	24	4
121	0.0915071	0.136559	0.0601578	0.0416373	0.0297447	0.0361212	0.00369503	0		arcB	AGGTTGTCGTGAAGGAATTCCCTA	24	2
122	0.137823	0.0457879	0.01497	0.0027471	0.00106624	0.0151355	0.0184202	0		aaeR	ATCACTTTTAAGTCAGAGTGAATA	24	1
123	0.206036	0.220211	0.108478	0.207834	0.050193	0.0450212	0.00452118	0.000232705		yhdT	TTCTTCACCCATCAGGGACAAAAA	24	2
124	0.00414744	0.000918078	0.0193349	0.0194418	0.108992	0.235748	0.323714	0.121237		arfA	GTTAAATAACCAACTGGAGTTTTT	24	7
125	0	0	0.00159784	0.000468627	0.0802326	0.326423	0.336234	0.188691		nirB	AATAGAAAAGAAATCGAGGCAAAA	24	7
126	0.0622241	0.189885	0.894703	1.43619	1.87351	0.858409	0.236612	0.00191463		aldB	ACCTCACACCGCAAGGAGACGATC	24	5
128	0.0748406	0.105459	0.101575	0.059488	0.0634851	0.006447	0	0		tnaC	GTGTCTTGCGAGGATAAGTGCATT	24	2
129	0.0790702	0.109228	0.0621161	0.0379328	0.0351812	0.0724527	0.0130008	9.49123e-05		srkA	TCGTAATGTTTTCCGGATGATGGG	24	2
130	0.0010344	0.000756856	0.00578244	0.0135995	0.00357645	6.33088e-05	0.00128095	0		rhaB	AATGAAATTCAGCAGGATCACATT	24	4
131	0.00111658	0.00104673	0.0001023	0.000667249	0.000125909	0.0176828	0.387895	0.704947		zraP	AAGACAACCACTGGAGGATTAACC	24	8
132	0.00310321	0.0383464	0.101122	0.042347	0.125947	0.0794291	0.000265264	0		iclR	ACGATACAGAAAAAAGAGACTGTC	24	5
134	0	0	0	0	0	0	5.30529e-05	0		yjbQ	GAGAGTTTTATCAAGGAGCAGCAC	24	7
135	0.00795633	0.0014335	0.00841791	0.0151326	0.0390779	0.0258203	0.0500572	0		melA	ATTCAAGCAAGCCAGGAGATCTGC	24	7
136	0	0.0418416	0.0407157	0.0710299	0.138834	0.3707	0.260176	0.467641		ytfJ	TGCATATCATAAGAAGGAAACACC	24	8
137	0.0711907	0.107391	0.215407	0.18465	0.0945973	0.0299208	0.00184184	0		frsA	AGTAAGTATTCTGGAGGCTGCATCC	25	3
138	0.495146	0.470091	0.240816	0.159939	0.0919947	0.054444	0.0674336	0.0540202		sbcD	CATGCTTTTTCGCCAGGGAACCGTT	25	1
139	0.51778	0.189144	0.147907	0.0795257	0.0112633	0.01303	0.116966	0.000784835		nrdR	GTTAACCACCTGGTCAGGACGCCGT	25	1
140	0.00157572	0.0478972	0.029258	0.0526971	0.0784571	0.0448326	0.115801	0		yajQ	ATCAAAAATGAAGGGAGAGGAAAAG	25	7
141	0.0110015	0.0188269	0.0205917	0.173936	0.399945	0.228395	0.0771297	0.000474562		ybeL	AGTTAACGACCCGGGAGATGAAACG	25	5
143	0.553375	0.146822	0.235019	0.278619	0.0321609	0.00944823	0.0149791	0.000362305		yceJ	TCGCAAATTCGTTTTGGATGCACTT	25	1
144	0.0111515	0.030472	0.311657	0.526838	1.17644	0.542129	0.147478	0		flgB	GAATTTTGATACCTGCGGAGGAGAT	25	5
146	0.0808683	0.137943	0.194391	0.151127	0.0515955	0.0394121	0.000360026	0		yciW	TTTCCTTTACGACCAAGGAGCGCCC	25	3
147	0.026237	0.0186347	0.0148531	0.01744	0	0	0	0.0168848		ydcR	ATCTGCACATAATTACGATTCGATA	25	1
148	0.010436	0.0559987	0.0267395	0.0865038	0.0605589	0.0480238	0.00293326	0		manA	TTCCACATTAAAACAGGGATTGATC	25	4
149	0.14287	0.24761	0.136406	0.130511	0.0673644	0.00190203	0.0203645	0.000750147		btuD	GCATTAAACTGGCGTTGGCAAAATA	25	2
150	0	0	0	0	0.000229504	0.000739525	0.000106106	7.75683e-05		yebE	TAAAAATGGTTATTGAGGAGCAAAT	25	6
151	1.04505	0.636558	0.369822	0.163468	0.0396915	0.0669714	0.022862	0.0460687		flhB	TAATACTCTTTCCAGGATTGGCGAC	25	1
152	0.23411	0.0881742	0.0939316	0.055094	0.0526331	0.0162643	5.30529e-05	0.000172481		tar	CAACTTGTTTTCAGGAAGGTGCCTT	25	1
153	0	0	0	0	0	6.33088e-05	0.000106106	0.000250049		tcyJ	AGACATAACAACATTCGGGGTGAAT	25	8
154	0.0238109	0.0308088	0.126312	0.43704	1.29773	1.02759	0.568349	0.0416864		cdd	CATTACATGATTATGAGGCAACGCC	25	5
155	0.0338843	0.00810067	0.0283374	0.0157083	0.0141257	0.0108128	0.000879211	0		ligA	GGGTTTTTAGCATTGATGGTGCGAT	25	1
156	0.230112	0.163132	0.0846905	0.0601393	0.0233792	0.035647	0.000106106	0		glrK	ATTCGCGTCTGACGAGAGTAACACC	25	1
157	0.00247971	0.00428382	0.125411	0.191184	0.199843	0.0418759	0.0361943	0.000155137		ygaM	ACATCGAATTCTAATGGGGGATCAT	25	5
158	0.104446	0.137056	0.155332	0.0823416	0.0603773	0.00251632	0.0215412	0.00320776		higB	AATTTGTCAACGGACGTGATGAAGA	25	3
159	0	0	0.00103275	0.0037759	0.00967585	0.0354046	0.161813	0.154382		slp	AATATTTGTTGATAAGGATAGTAAC	25	7
160	0.444559	0.512928	0.494439	0.378042	0.101095	0.0472505	0.0444332	0.000344961		dgoR	AACATACAGAGCACAAGGACTCTCC	25	2
161	0.00501748	0.0799172	0.202064	0.205267	0.362681	0.255904	0.00828061	0.0721596		rhaS	GTGTTGACGACATCAGGAGGCCAGT	25	5
162	0.0523052	0.0852628	0.0638503	0.0379039	0.000634325	0.00538955	0.000879211	0		trmA	GTACTTTAATTTTTCAGGATACATC	25	2
163	0.020345	0.0248182	0.241313	0.635331	1.7525	2.47515	2.25546	1.85185		psiE	TCGCCACTGTGAAGGAGGTACTGCT	25	6
164	0.0116589	0.000579754	0.00597729	0	0.0284394	0.305953	0.194311	0.00101754		epmA	CTTGTCAAAAACTGGAGATTTAACT	25	6
165	0.143372	0.107472	0.0782309	0.0329295	0.0146963	0.0130961	0	0		queG	GTTTTTCTTCATTGTATGGTCCGTC	25	1
166	0.000164361	0.0010793	0.00118376	7.81045e-05	0.000404821	0.000401417	0	0		cynT	ATTCCAGAGACAGACAGAGGTTAACG	26	3
167	0	0	0	0	0	0	0	0		queA	CTCTTATTTTAGTCTGAGTCAGTGTC	26	1
168	1.00233	0.610625	0.496607	0.187615	0.017683	0.0575555	0.0546808	9.49123e-05		umpH	ATTGTTGTCAATATTCTGGGTAGTCC	26	1
170	0.239696	0.119999	0.117904	0.065319	0.077112	0.000887706	0	0		cecR	TCATTTGATTAAGAATGGACTGTGCG	26	1
171	0.146026	0.135481	0.218855	0.0956219	0.0772299	0.110873	0.000773106	0.0511107		ltaE	ATTTCCCGTCATAATAAGGACATGCC	26	3
172	0.0332027	0.117843	0.0748403	0.0627705	0.0523558	0.0186769	0.0518844	7.75683e-05		matP	AGTTACACGGTAACATTGAGATCGCT	26	2
173	0	0.000177102	0.00231882	0.0852366	0.0954197	0.0969527	0.0402933	0		mgsA	AGGAAAGTTAACTACGGATGTACATT	26	6
174	0.141104	0.392672	0.262543	0.484315	0.366288	0.144613	0.0551169	0		agp	GATTGATAACAAAAGAGGTGCCAGGA	26	4
175	0	0	0	0	0	0	0	0.000250049		trpL	AAGTTCACGTAAAAAGGGTATCGACA	26	8
176	0.0989695	0.0935072	0.0833704	0.0819784	0.04942	0.026514	0	0		fnr	ATATCAATTACGGCTTGAGCAGACCT	26	1
177	0.00253777	0.00589524	0.0930645	0.280388	0.409009	0.280158	0.00335585	0.000517442		zntB	AATAATGCGTTGATGATGGAGGCACT	26	5
178	0.0479264	0.0186022	0.220648	0.924418	1.42995	0.385263	0.340434	0.00250964		ydfG	ACACAAAAGCGTTGAGGAACAGTGAG	26	5
179	0.677157	0.394667	0.294042	0.146646	0.0760473	0.110011	0.0865135	0.000189825		ydfH	GTTAACTCACTCACAAGCAAGAACGA	26	1
180	0	0.00444505	0.00103275	0.000276726	0.0161896	0.0574115	0.0236333	0.149094		dicC	TATGACTAACAATAAAGGTGTTTTAA	26	8
181	0.173941	0.156338	0.0697594	0.158612	0.00837213	0.00176463	0.00757774	0		mgrB	ATAAGGTAGGTGAAACGGAGATTGGA	26	1
182	0.00338369	0.00352697	0.00273289	0.00467074	0.00352226	0.000401417	0.000200868	0		ptrB	ATGTTTCAACCAGAAAGAACAATAAC	26	4
183	1.59785	1.14697	0.849642	0.562459	0.236501	0.100112	0.00728395	0.180441		mlrA	GGGACCTCGCGAGCAAGGGTGAGACG	26	1
184	0.134575	0.0525051	0.0225013	0.0166879	0.0156366	0.00180638	5.30529e-05	0		yojI	TGTAATTCATTGTCCGGGTTTTCTGC	26	1
185	0.00171597	0.117442	0.145667	0.106979	0.165334	0.238079	0.132463	9.49123e-05		elaB	AGGTTTTACGCAAATGGAGAACGAGA	26	6
186	0.17424	0.162748	0.112872	0.233672	0.0268234	0.0249382	0.0179768	0		dsdX	AGGTTAATCACAGGGGAAGGTGAGAT	26	4
187	0.760757	0.225803	0.164076	0.0818931	0.0577188	0.104526	0.00364965	0.127414		hycA	ATCTCTGTTAAACGGGTAACCTGACA	26	1
188	0.287459	0.11807	0.119599	0.0741339	0.0289925	0.0405976	0.0545882	0.0435244		araE	GTCTTACTCTCTGCTGGCAGGAAAAA	26	1
189	0.000270659	0.000579754	0.00232369	0.0307405	0.270267	0.113456	0.0891021	0		nfeR	ATCTAATTAAGCAAAAGGAGGCTGAT	26	5
190	0	0	0	0.000276726	0.000229504	0	0	0		glpE	ACTTGTTTGTAAAGAAAGAGAGACGC	26	4
191	0.0402649	0.102753	0.142067	0.0675462	0.183483	0.186826	0.0114546	0.00664822		kbl	GAATTTGCCCTGTCTGGAGAATCGCA	26	6
192	0.105181	0.146223	0.076029	0.0474103	0.052743	0.00303357	0	0		yicH	ATGTGCATTTCACGGGATGGAAGACC	26	2
193	0	0.00114363	0.0239384	0.0568459	0.13973	0.0869574	0.0476969	0		asnA	AGCAACAGGACGCAGGAGTATAAAAA	26	5
194	0.000270659	0.000112775	0.000516376	0	0	0	0	0		polA	TAATCTGATAAACAGGCACGGACATT	26	3
197	0.000270659	0.0586402	0.0539954	0.0938814	0.129543	0.00179698	0.000253921	0		araB	ACCCGTTTTTTTGGATGGAGTGAAACG	27	5
198	0.340641	0.401917	0.309036	0.261542	0.164609	0.0408251	0.0254294	0		skp	TGCAAATGGGATGGTAAGGAGTTTATT	27	2
199	0.000493084	0.0135122	0.0496256	0.0524561	0.0448857	0.0688991	0.0424985	0		gmhB	ACATGCCTTATTAAGGAGCTATAAAAG	27	6
200	0.289477	0.376462	0.464334	0.215195	0.114223	0.0203797	0.142615	0.0167215		yafV	ACCCTTCGCATAAAGGAGTTGTACACC	27	3
201	0.0502507	0.30969	0.240305	0.267152	0.316402	0.281025	0.0196159	0.0125819		betI	ACACCGCTGATGAATGGAGTGGCGAAA	27	5
202	0.00035284	0.00990506	0.100815	0.196601	0.262278	0.199349	0.000200868	0		tauA	CATAACAAGACAGGGGAGCAGACAATC	27	5
203	1.43591	1.18295	0.691135	0.623378	0.198136	0.11123	0.069372	0.00454472		hemB	CTCGATTCCACAAACATCAGGCAGACC	27	1
204	0	0	0	0	0	0	0	0		ybaQ	TTCACAAGGAAGCAACAGTTAAAAACC	27	1
205	0.0835883	0.146849	0.0513551	0.00211554	0	0	0	0		cusC	CATAAAATCACCAGAAATTATGAGCCT	27	2
206	0	0	0	0	0	0	0	0		poxB	GTTATCACATTCAGGAGATGGAGAACC	27	1
207	0.0571771	0.0454988	0.0541561	0.0894206	0.0266799	0.0100072	0	0		flgK	GTAATTGAAGGCTTATAAGGAACCTCC	27	4
208	0.031443	0.0282658	0.0495233	0.0133807	0.0225504	0.00233441	0.00178879	0		yciI	AACTTTCCCGAACAAGGAGTTGTGCCC	27	3
209	0.0153374	0.0781771	0.18022	0.12216	0.112851	0.0562893	0.0459	0		gadB	CGATCCAATCATTTTAAGGAGTTTAAA	27	3
211	0	0	0	0	0	0	0	0		ynfM	TACAGGCATATTTAGCAAGGATTTCAA	27	1
212	0.128093	0.159736	0.0511163	0.0200666	0.0286897	0.0017768	0.0013018	0		pdxH	ACCCACTGACAATCCGTAAAGAAAACC	27	2
213	0.0647422	0.143983	0.0579705	0.0312717	0.0557632	0.00034889	0	0		ydhI	ATATTCGGTCGTAAAGGAATCTACTTT	27	2
214	0.422001	0.428729	0.346118	0.3777	0.210206	0.0594011	0.0507073	0.00373435		ydiP	GCTTGCTCATGGAATAGGGAGGTTGTC	27	2
215	0.0217323	0.0014335	0.0455482	0.0158065	0.40138	1.27598	1.76414	3.47744		osmE	ACACGCTGATAAACAAGAGGACGGAAT	27	8
216	0.84941	0.346221	0.235443	0.304378	0.0952301	0.0279527	0.00108008	0.00131962		ynjE	CTCAAAACTACAATGTCGGGATTTTCG	27	1
217	0.707081	0.70969	0.458697	0.459129	0.340193	0.0984453	0.0393113	0.0609156		cbl	GGAAATCTGAACTGCCCGGAGTTTACC	27	2
218	0	0	0.0196369	0	0.000863829	0.0266124	0.0674072	0.0118829		yeeE	ATTAACATTCATCTGGTTAATTAATTT	27	7
219	0.00285667	0.0584614	0.0652338	0.0660891	0.0230764	0.000782653	0.000200868	0		inaA	GTTAATAAAAATGACAGGCGATAGGGT	27	4
220	0.00416173	0.0169916	0.0289219	0.0986571	0.146912	0.289816	0.308344	0.3364		yfeK	ATCACAAAACAAGGATAAGGTAATTCA	27	8
221	0	0	0	0	0	0	0	0		yfeY	CGTTATTGAATAACCAAAGGAAGTGAC	27	1
222	0.000246542	0.028539	0.0963089	0.266253	0.450301	0.860198	0.667543	0.0838063		hydN	CATTAACTGTCATTGCTGGAGAATTTG	27	6
223	0	0	0	0	0	0	0	0		queF	AGTTTATCTGGTTTATGACGGTGAAAC	27	1
224	0.0059697	0.0111122	0.236768	0.219833	0.388679	0.228697	0.0852212	0		yghU	ACACTACCACTCAGAAGGCAACTCACT	27	5
225	0.0193785	0.049025	0.102462	0.0339986	0.0519557	0.0244773	0.00285936	0		garP	TCAGCATAAGTACCCGAGGTAAATAAA	27	3
226	0.257427	0.231741	0.209161	0.169033	0.0473943	0.0355622	0.000180013	0		degS	GTTCCCTTTTTTAATGACGCCTCCATC	27	1
227	0	0	0	0	0	0	0	0		yhhY	GACATTTACCCCAAAGAGGACAAAGGA	27	1
228	0	0	0.0194177	0.00978114	0.0128794	0.390482	0.456191	0.434028		gadA	CCTTCAAATAAATTTAAGGAGTTCGAA	27	7
229	1.26622	1.14719	1.22612	0.983767	0.608959	0.0270744	0.039567	0.00366497		malS	AATCGCAGCAATAAGGACTCATCCGCC	27	1
231	0.000164361	0.0851341	0.0270561	0.0352705	0.0651108	0.0860608	0.000581749	0		yihV	GCATCCCAAAATGTTTAAGGAATGACC	27	6
232	0	0	0.00380948	0	0.00073792	0.0166389	0.0481151	0.00774429		fpr	GCAAGTCAATCAAAACAGGAGAAAAAC	27	7
233	0	0.0172322	0.0654969	0.0144808	0.0172527	0.00259981	0	0		yjhC	ATCCGTGGCTAAATGATTGGAGGCTTT	27	3
234	0	0	0.000311776	0.00286762	0.00501563	0.0057694	0.0044985	0.00799433		yjjZ	ATCATTATCAATGAAAGAGATGAAATC	27	8
235	0.00233946	0.00843899	0.0368819	0.0505795	0.0934403	0.0698958	0.0731453	7.75683e-05		ykgM	TTATGTTATAACATAACAGGTAAAAATG	28	5
236	0.644931	0.425427	0.379614	0.344305	0.105862	0.0758297	0.120011	0.101818		prpR	ATTCGGTTTCTTAACTTTGCGGTGCGCT	28	1
237	0.361106	0.210099	0.187629	0.176718	0.128373	0.123205	0.0610193	0.00505397		lacI	GGAAGAGAGTCAATTCAGGGTGGTGAAT	28	1
238	0.0175223	0.0350291	0.0986618	0.0681291	0.221003	0.122319	0.067671	0		aroM	GACGAAAGAAAAGTAAGGTGGATGAACA	28	5
239	0.00664144	0.0886119	0.0689166	0.0586625	0.0544579	0.0536356	0.000613947	0		borD	AACTTCAAAAAGCATCGGGAATAACACC	28	2
240	0.312468	0.662515	0.473117	0.417423	0.19782	0.0760613	0.0781341	7.75683e-05		kdpF	ATCACTTTTAGGCCACTGGAGGTGCACT	28	2
241	0.0115088	0.0181661	0.177224	0.177821	0.331438	0.0994342	0.0135182	0		ybiI	GTACAAGTATTGATATGGGGAGGTCGAT	28	5
242	0.0118376	0.0143017	0.0167919	0.00868095	0.0390779	0.020948	0.000360026	0.00626857		trxB	ATTGTCTGCCAACAACTATGGGGATCTC	28	5
243	0	0.000112775	0.015462	0.0183059	0.06735	0.0900139	0.189024	0.0752835		fabA	CTTCAATAAAATAAGGCTTACAGAGAAC	28	7
244	0.135155	0.351503	0.517252	0.61995	0.300246	0.278769	0.0230058	0.000655235		sulA	ACAGTAACTCACAGGGGCTGGATTGATT	28	4
246	0	0	0.000414076	0.000908283	0.000278912	7.40908e-05	0	0		clsA	AATGCGCTTTCAAAAGGATTTCTAATCT	28	4
247	0	0	0	0	0	0	0	0		tyrR	ATTGTTCTTTTTTCAGGTGAAGGTTCCC	28	1
248	0	0	0.0176932	0.0470648	0.129933	0.0886778	0	0.00108692		paaZ	AGAAATGTGAAACATCTGGAGAGTAGCG	28	5
249	0	0	0	0	0	0	0	0		znuC	TCATGACTACTGCAAGACTAAAATTAAC	28	1
250	0.00297279	0.0320175	0.0964745	0.026797	0.761107	4.74708	4.57506	0.192879		dcyD	ATCACAACAACACACATCGGAGGCTGTT	28	6
251	0.0585161	0.120966	0.118732	0.119527	0.0388389	0.0089929	0.0250902	0		sbcB	AGACAGCAGAAATAACGGATTTAACCTA	28	2
252	0.0550261	0.0417931	0.0608203	0.0637502	0.0735658	0.011912	0.020044	9.49123e-05		lysP	TCATTTTTAAGATGGATAGCATTTTTGT	28	5
254	0.0644036	0.0425834	0.232403	0.268735	0.484459	0.585479	0.232562	0		ubiG	TCTTGCCAATTACGGAGTAGAAGTGCCA	28	6
255	0.0396074	0.0163141	0.0141175	0.00818336	0.00340113	0	0	0		mntH	AGCAAAGGCTATGTTTTAGAGGCACAAG	28	1
256	0.0131185	0.0415032	0.172864	0.263022	0.257286	0.100668	0.033822	0		kbp	AGTGTTTCCGTTAACGAATGAGGTAGCT	28	4
257	0.0650566	0.306295	0.21678	0.371108	0.333051	0.178741	0.0194663	0.0033547		rpiA	GAAATTTCATACCACAGGCGAAACGATC	28	4
258	0.384621	0.107082	0.182334	0.0437529	0.0227257	0.00218761	0.000519185	0		argO	ATCAGATACTTAATTCGGAATATCCAAC	28	1
259	0.39382	0.2678	0.149116	0.158808	0.142216	0.0911739	0.0803513	0.0686709		tdcA	GTCAATGAGGTAATTAACGTAGGTCGTT	28	1
260	1.2749	1.16954	1.15268	0.782481	0.280512	0.0759682	0.0340042	0.00260455		yhfG	CAAATGGACACGTTCAGGGAGGCATCAA	28	1
261	0.000164361	0	0.00519297	0.0953792	0.120211	0.222415	0.326449	0.000362305		rtcB	CAGCAAACAACGAAAAGAGAAAAACAAA	28	7
262	0.062007	0.0647927	0.0880323	0.0444113	0.0162805	0.0076836	0.000593092	0		glpG	CTTTTGTGTGGAATAAGCGACAGCAACG	28	3
263	0.32083	0.481565	0.378445	0.535582	0.345505	0.11222	0.0458034	0.0186698		dfp	CTGGTGTCACCCTACAGGAAAAATCATC	28	4
264	0.0637471	0.0941537	0.117622	0.0778229	0.0213774	0.000126618	0	0		asnC	GAATCATCAATCCGCATAAGAAAATCCT	28	3
265	0	0	0	0	0.00240661	0.00454497	0.000814815	0		ppiC	CTGACAATTATTCACTCAAGGCACGATC	28	6
267	0.00751148	0.110081	0.0880079	0.13994	0.116211	0.0139824	0.00496463	0		yihW	CAGGGTGATGGTTTTTCGAGGAATTTTC	28	4
268	0.446404	0.407971	0.253292	0.108549	0.0272282	0.0166442	0.00130363	7.75683e-05		rraA	ATTCTCGCAGCAACTGAATGTTAAGCCT	28	1
269	0.0509421	0.0628763	0.0835992	0.0407135	0.00372467	0.0410905	0.000180013	0		lexA	ATAACTGTATATACACCCAGGGGGCGGA	28	3
270	0.290418	0.972725	0.936876	1.08726	1.01273	0.26304	0.225991	0.000267393		aidB	GTGACTGCCATTGATGGAGGGAGACACA	28	4
271	0.000681563	0.000515426	0.00928502	0.0495062	0.0658806	0.254591	0.295084	0.680024		panB	AGCACAACATCAATTTATCAGGATACGTT	29	8
272	0.355606	0.494115	0.52492	0.55652	0.834958	0.790198	0.208518	0.00369147		sfsA	GCGCTAACGCAATAACAAGGATTGTCGCA	29	5
273	0.0851596	0.291528	0.161465	0.208667	0.219045	0.0876283	0	0.0267692		ppnP	GATGTTCAACTACCAAACAGGGCCAGTTT	29	2
274	0.00989918	0.048446	0.0391618	0.0905342	0.0987747	0.156611	0.0325941	0		nfsB	ACGCAAAATTACTTTCACATGGAGTCTTT	29	6
275	0	0	0	0	0	0	0	0.000267393		ybhQ	GTAGAGATAAATTCTTCAGGAGAGAAGCC	29	8
276	0	0.000644081	0.0564847	0.173431	0.441427	0.381941	0.0194831	0		rpmF	GGATAAACCGTAATTGAGGAGTAAGGTCC	29	5
277	0	0	0	0	0	0	0	0		umuD	AAAAACAGTATAACTTCAGGCAGATTATT	29	1
278	0.239842	0.0624888	0.0678011	0.0501197	0.00994999	0	0	0.0496214		ycgR	GACAGTTTGTCAGTCAGGAGTTTTTCCGC	29	1
279	0.0422122	0.102771	0.0345582	0.0168219	0.0506886	0	0	0		pth	AGTTATGTACACACTCAGGACAAAAAAAC	29	2
280	0.0257439	0.0644377	0.105662	0.142696	0.225356	0.187053	0.00509159	0		ompW	GTTTTTATAACCATAACGACGGAGCGGAT	29	5
281	0.0100251	0.042986	0.063597	0.0297272	0.00352226	0.0228824	0.000180013	0		yciZ	TTCCCCCTTTTGCTATAAGGATGTCCTTG	29	3
283	0.000246542	0	0.0455677	0.0398187	0.0788476	0.2528	0.443977	2.26638		fdnG	AGTAATACCCCTGAAAAAAGAGGAAAGCA	29	8
284	0.051478	0.0338704	0.155824	0.289321	0.970926	1.21798	1.11915	0.0240505		osmC	TTCCTTTTTAAGCCCACAGGAGAGCAACA	29	6
285	0.375209	0.664415	0.580879	0.642729	0.464041	0.242007	0.0410452	0.000939972		dgcZ	GCACAAGGAACTGTGAAAAAGGAGTGGCA	29	2
286	0.063346	0.0202279	0.112794	0.0726054	0.00313975	0.000887706	5.30529e-05	0		xthA	ACTCTTTATCTGAATAAATGGCAGCGACT	29	3
287	0.0746083	0.150489	0.142627	0.155016	0.107034	0.0735867	0.00870136	0.000689923		ynjF	CAGAAAGGCTTTATATTTAAGGAGTGCCT	29	4
288	0.0712532	0.0992396	0.133556	0.0843438	0.115168	0.0433536	0.0522839	0		ynjI	CTCTAAAGTATGTAATAACAGGGAATGTG	29	3
290	0.0712094	0.00967951	0.00994754	0.022749	0.0598433	0.0177058	0.07889	0		yeaY	TATGCCCTGAGAAAAAAAGGAGTCGCACC	29	7
291	0.00204469	0.00086963	0.000360488	0.000312418	0	0	5.30529e-05	0		zinT	CATATACATTAACTCTGGAGGAAACTGTT	29	1
292	0	0	0	0	0	0	0	0		yehF	TCAACTGGATAAAATTACAGGGATGCAGA	29	1
293	0	0	0	0	0	0	0	0		cysP	GAAAGTCATTAAATTTATAAGGGTGCGCA	29	1
294	0.0749459	0.111063	0.457674	0.787632	0.261549	0.0493682	0.00671171	0.36545		mazE	ACATATGATAGCGGTTTGAGGAAAGGGTT	29	4
295	0.0466785	0.0289258	0.0218924	0.0268084	0	0.00112076	0	0		sdhE	GTACTGGATTTTCGTGAGACAGGAAGAAG	29	1
296	0.338228	0.118634	0.15065	0.171222	0.0327586	0.00711243	0.000180013	0.073921		ygfB	AATATTCCTCCCTTTGACGACGAATGCTT	29	1
298	0.00925156	0.0139959	0.0273971	0.0244094	0.00385536	0.042261	0	0		ebgR	GCACATCAGGGAAAGTAAAAAAGGTAAAC	29	6
299	0.0479211	0.0215978	0.0415001	0.0193838	0.00993245	0.0074276	0	0		ygjR	AGAATCCCTTTATGGAGTATCCACGCGTT	29	1
300	0.00353823	0.000112775	0.0181998	0.000432935	0.175759	0.911725	0.706014	0.172746		zntA	AATGAGAAAAAACTTAACCGGAGGATGCC	29	6
302	0	0.00336575	0.0108829	0.00836854	0.011633	0.0278194	0.00216016	0		rpoZ	CATTTCTTCACCTGTGGAGCTTTTTAAGT	29	6
303	0.00353823	0.0324352	0.0928551	0.0948191	0.267469	0.29008	0.428701	0		rbsD	AGCGAAACGTTTCGCTGATGGAGAAAAAA	29	7
304	0.0470171	0.031873	0.050522	0.0379551	0.00595118	7.40908e-05	0	0.00363029		cadC	ATCATTCCCTTTTCGAATGAGTTTCTATT	29	3
305	0	0	0	0.000859149	0.00722939	0.00542189	0.00595178	0		idnD	GAGGTGTCTACCTGACCAGTGAGGAATTT	29	5
306	0.0563651	0.00824601	0.192711	0.195388	0.188929	0.182235	0.0563408	0.0311569		ampD	GTATTAGCACCACATATAAGGAGATCCTGC	30	4
307	0	0	0	0	0	0	0	0		mtn	CTTCAAATCGGGCTTATCGCGAGTAAATCT	30	1
309	0.0914535	0.194215	0.134779	0.112765	0.0364594	0.0259376	0.000159159	0		xseB	GCGAAAAATATTGAGAGTCAGACATTCATT	30	2
310	0.536053	0.77106	0.378328	0.377532	0.418067	0.120612	0.000507841	0.0303392		pheP	CTCAACAAAAAAGACACACAGGGGAAAGGC	30	2
311	0.926326	1.38299	0.56511	0.389915	0.0536802	0.0443154	0.0271823	9.49123e-05		moeA	ATTCGATTTTGCCTCCGCAGGAGTGTTTTC	30	2
312	0.307566	0.132403	0.146246	0.0975099	0.00856021	0.0190756	0.000424423	0.000362305		appC	ATTTTTCTCTCTTCGCCTACAGGAGTGCGC	30	1
313	0	0	0	0	0	0	0	0		torR	AGATATGAACAGAATGAGTAAAACCCTCTG	30	1
314	0.130654	0.141643	0.0935663	0.104565	0.035731	0.0118352	0.00042259	7.75683e-05		paaX	AATCACAACAATAACAACAGACTGAAGCGA	30	2
315	0	0	0.00118864	7.81045e-05	0.015133	0.0356592	0.0191707	0.073326		ydeN	GAATTAAGTACAATAAGAAGAGGAACATTT	30	8
316	0.00725511	0.0320827	0.123501	0.248139	0.53767	0.306313	0.101474	0.0843238		lsrA	AACTCACCTGCAAAACTGAACGGGGGAAAT	30	5
317	0.0997386	0.386165	0.336497	0.400404	0.447422	0.0685259	0.00682732	0		yniB	GAAACGACGCGTCTTAATCAAGGAGAACTC	30	5
318	0.0859179	0.0275081	0.0435753	0.0631967	0	0	0	0		fliA	GATAACTCATATAACGCAGGGCTGTTTATC	30	1
319	0.00923727	0.0347249	0.1336	0.123803	0.282807	0.123503	0.120027	0		amn	TGCGGTAATTGTATGGAACAGGAGACACAC	30	5
320	0.000164361	0	0.0118961	0.0401177	0.126299	0.229791	0.124119	0.143434		gatY	GAAATCGAAAACAAACGACAGGATATGAAA	30	6
321	0	0	0.0001023	0	0	0	0	0		intS	AAAATAATTTTACCCACCGGATTTTTACCC	30	3
322	0.0121279	0.00196481	0.04946	0.187384	0.551654	0.229044	0.0818368	7.75683e-05		hyfA	AATGTTTCATATCATTTTCAAGGAGCCGAC	30	5
323	0.131118	0.27286	0.227726	0.308025	0.0798198	0.0612208	0.000720053	0		galR	ATGTAAGCGTTTACCCACTAAGGTATTTTC	30	4
324	0	0	0	0	0	0	0	0		exbB	ATTTTGTGACTTGCGTCCTGGAGATACACA	30	1
325	0.0213893	0.071008	0.159847	0.333189	0.408415	0.0313553	0.0394821	0		prlF	AGAAAACAGGCTGTAAAAGGACAGTGAATC	30	5
326	0.0395538	0.0631805	0.00775052	0.0514609	0.07956	7.40908e-05	0.0109903	0		pitA	GTTCATGTCCTCAAAATGGCGTAACGTCCT	30	5
327	0.021592	0.0402318	0.378703	0.351861	0.599457	0.521803	0.167059	0.000284737		yidL	GTGAGCATAATTCGCCGGAGGGATATTAAA	30	5
328	0.014738	0.0648237	0.0294139	0.0533778	0.000125909	0.000126618	0	0.000172481		rep	CCCCCCGTTCGAAGATTGAGCAATACACCT	30	2
329	0.0491681	0.0740871	0.155746	0.156838	0.278556	0.152633	0.00588555	0.0562697		yifL	GAAAGCGATGAACTTTACAGGCAATCCATA	30	5
330	0	0	0	0	0	0	0	0		treB	AACCAAAAATGTCATCTGCCATGGGGCTTT	30	1
331	0	0	0	0	0	0	0	7.75683e-05		decR	AAAAGAGAAAAAAATTCTCTGTGGAAGGGCT	31	8
332	0.012529	0.000289877	0.00494454	0.0446389	0.000404821	0	0.00140791	0		rna	ATTCAGTGTATGTATGAGTTCCACACCCATT	31	4
333	0	0	0	0	0	0	0	0		pagP	TAGATTTTTGATAAATGTTTTATGGTCACAA	31	1
334	0	0.000177102	0.000462788	0.00530902	0.00957226	0.026483	0.00153487	0		nei	GATTAATAAAGAATGAAAAAAGGATATCACC	31	6
335	0.000599382	0.000177102	0.0002046	0.000234313	7.65014e-05	6.33088e-05	0	0		ompX	AGGACTTATTTGAATCACATTTGAGGTGGTT	31	1
336	0.080829	0.181508	0.177088	0.149491	0.302382	0.125816	0.0586601	0.00938237		iaaA	AGTGGCGAACCACCCTTAATGGACGAATACT	31	5
337	0.0144334	0.00459039	0.0272169	0.0567141	0.339358	0.426628	0.324714	0.155186		ycaR	GCATTCATAACCCGATCCATCTGGAGGAACT	31	6
338	0	0	0.000155888	0	0	0	0	0		pepN	CAGACTCTATAAAAGATGCTAAAGGTTATTT	31	3
339	0	0	0.00314697	0.00266899	0.00293734	6.33088e-05	0	0		bluF	CTCTCGCCTCACCCATTACCCTGGATTGTTA	31	3
340	0.346126	0.729433	0.51318	0.575655	0.494527	0.103418	0.00847196	0.00297505		trg	CAGGAGTAAACCTGGACGAGAGACAACGGTA	31	2
341	0	0	0	0	0	0	0	0		relB	ATGACATTTGTAATTACAAGAGGTGTAAGAC	31	1
342	0.000517201	0.000579754	0.000360488	0.0024414	0.000377727	0	0	0		add	GCACTTTTATATCCAGAAAAAGAGTGCGACC	31	4
343	0.0104119	0.0300352	0.0964356	0.110465	0.0176782	0	0.000983484	0		pheM	TTTTGAAGAGTACCAAAAGGTAACGCAAGCA	31	4
344	0.215874	0.397996	0.180551	0.128219	0.106226	0.00220918	0.00824841	7.75683e-05		hisL	ATCAGTTGAATAAACATTCACAGAGACTTTT	31	2
345	1.64756	1.18434	0.783104	0.312448	0.0550891	0.0527194	0.0168704	0.00284545		yfbR	ACCTGATGATGTCATCATACGTAAGGTCACT	31	1
346	0	0	0	0	0	0	0	0		yfdX	TTTTCTAAAACTGTTAAAGAATGAGGTAAGT	31	1
347	0.251898	0.33561	0.149866	0.072681	0.100394	0.0209265	0.00236103	0.000172481		ygfZ	AATACGCCGTTAAGCAACTCAGGACTCTATT	31	2
348	0.141603	0.201041	0.149437	0.177049	0.0926529	0.0225767	7.39074e-05	0		yhbY	GTTTTCAATCCCAACGTAAGCAAAAAATACG	31	2
349	0.0454994	0.244028	0.677422	0.922496	1.24537	0.467776	0.24591	0.00205242		yrbL	AGATCGTCAGAAAATATTTCCAGGAGATGGC	31	5
350	1.72459	1.04967	0.912343	0.831209	0.137602	0.0996172	0.0424022	0.512727		avtA	CCTTGCTACAGAGTTCGACAGATATCCCGCT	31	1
351	0	0	0.00201192	0.0417222	0.0427755	0.17645	0.105974	0		rph	GCCACATTTGTTTCAAGCCGGAGATTTCAAT	31	6
352	0.0340442	0.0249644	0.0622233	0.0165519	0	0.000739525	0	0		yicC	TCCACCTCTCCTTTTATAAACAGGAACGTCT	31	3
353	0.237561	0.146769	0.25356	0.284352	0.366454	0.00703696	0.0355899	0		uhpT	CTCACGCAGGTATTCATTTCAGGAGTAACCC	31	5
354	0	0	0.0001023	0.00137019	0.00817292	0.0123538	0.00310193	0		gyrB	TAACCCAAGTATAAATGAGCGAGAAACGTTG	31	6
355	1.03472	0.655947	0.364371	0.172718	0.0595628	0.0283029	0.00768568	9.49123e-05		dnaB	CCCATTCTTTATCTCGGTAACTCCATTCACT	31	1
356	0	0	0	0	0	0	7.39074e-05	0		copA	AGCCAGTCAAAACTGTCTTAAAGGAGTGTTTT	32	7
357	0.00571333	0.0139149	0.10346	0.0575421	0.818552	3.04347	2.18422	0.793145		ompT	CAATCATTAAAACGATTGAATGGAGAACTTTT	32	6
358	0.00759366	0.316387	0.34072	0.554495	0.50054	0.399952	0.0209423	0.214599		msyB	TGAAACCTCATCAACTCAAAGGGAGAATCGTG	32	4
359	0.25838	0.11591	0.0438822	0.0524964	0.0103325	0.000940233	0	0		yciV	GCAAAAAACATTATCCAGAACGGGAGTGCGCC	32	1
360	0.0027986	0.0143493	0.012583	0.00647387	0.0539989	1.05424	1.10604	0.0884576		ymjE	AACGATTAAGACTGTGACGAGGAAATGAGATG	32	7
361	0.0301281	0.0339021	0.174365	0.613754	0.632116	0.0746967	0.00138705	0.000232705		sufA	ATACGCTGAAAGCGATGAAGTGAGGTAAATCG	32	5
362	0	0	0.00231882	0.00173174	0.00486263	0.0319265	0.00132266	0		xapA	GTTAGATTCCACCCTACAGAAAAAGGATATGT	32	6
363	0.000517201	0.0369796	0.0737735	0.235544	0.327752	0.079976	0.00150267	0		clpB	AGTAGCAACTTTGATCCGTTATGGGAGGAGTT	32	5
364	0.0183004	0.111113	0.0956367	0.136521	0.111579	0.0992885	0.00796046	0		pitB	GTTCGTAAATTCAAAATGGCGTAATCTAATAT	32	4
365	0.473221	0.549925	1.0555	0.883402	0.534567	0.0787068	0.0463607	0.412378		nepI	CTTTTCCCCTGAAACATGCCACGGGTAACACC	32	3
366	0.00733283	0.105587	0.297437	0.354922	0.260438	0.0113057	0.00715515	0		glnL	AAAATGGTGCAACCTGTTCAGGAGACTGCTTT	32	4
367	1.06342	1.08096	1.35352	1.1226	0.835889	0.311716	0.220191	0.172354		tyrB	ACCACCTGCCCGTAAACCTGGAGAACCATCGC	32	3
368	0.00605188	0.00541157	0.010045	0.00291003	0.000278912	0.00203943	0.00182099	0		can	ACGTAATTATTTGGTTACAGGTCGTTAACCTCC	33	3
369	0	0	0	0	0	0	0	0		helD	ATAAGAAATAATTTCGTGTGGATCTACAGAGTC	33	1
372	0	0	0.0002046	0.00819008	0.0019476	0.00165819	0.00012696	0.000155137		marC	TGATAACCCAGATACACAGGATAACAACCACCA	33	4
373	0	0	0.00484711	0.0134365	0.0684529	0.0826228	0.0460746	7.75683e-05		yeiP	ATTTTTGACATTTTCGACTACAGGAATTTTTCG	33	6
374	0	0	0	0	0	0	0	0		pdxB	GGTTAACTCTCGTCTCATACAGGTAACACAAAC	33	1
375	0	0	0	0	0	0	0	0		nupC	GGAAATTTAACCTGCCTCATATTTGGAGCAAAT	33	1
376	0.104016	0.110353	0.232593	0.21261	0.185154	0.088539	0.00092092	9.49123e-05		fldB	CAAAAGCCACAGCAGAATCGAGAAGCTTACGTT	33	3
377	0.0213553	0.1406	0.11691	0.110592	0.142263	0.0569749	0.0416083	0		oxyR	GCCATGAACTATCGTGGCGATGGAGGATGGATA	33	5
378	0	0.0307619	0.0628322	0.0197878	0.0840099	0.244008	0.340726	0.23071		yjaZ	ACTATTCCTGTGTAACTTTCTTAAGGAACGAGA	33	7
379	0.228917	0.236701	0.104663	0.206968	0.16561	0.0170671	0.000360026	0		actP	TAATAATGAAGTCCTGCATGAGGTACAAGCATC	33	2
380	0	0	0	0	0	0	0	0		ridA	CAGACTTTTTACCGCTGTAATAAAGGAGAAATC	33	1
381	8.21806e-05	0.000354204	0	7.81045e-05	0	6.33088e-05	0	0		argI	AATTCATTGAGGCGTTAGCCACAGGAGGGATCT	33	2
382	0.0186577	0.0645822	0.11975	0.125461	0.124162	0.0159046	0	0		slt	GCATTGATGTATTTACACTTAGAGGATGCGCTT	33	4
383	0.0438272	0.0529855	0.0834969	0.0577408	0.0177866	0	0	0		yadV	TCCCTGTTTTAATTAACTCTATCAGGGATGGTTT	34	3
384	0.258978	0.32103	0.289658	0.350334	0.177511	0.194459	0.0136279	0.707118		cysS	TCAATTACCCACACATGTCTAAACGGAATCTTCG	34	8
385	0.0153955	0.0366397	0.0397609	0.0661693	0.0278131	7.40908e-05	0.00701868	0		aspC	GACTTCCCTTCTGTAACCATAATGGAACCTCGTC	34	4
386	0.0465052	0.0700414	0.0655553	0.0431415	0.0486725	0.121061	0.0131146	0		mipA	GCCCGCTAAACATTTGTTTAAGGAATGATTAATT	34	6
387	0	0.000177102	0.00516376	0.00239227	0.0131662	0.067641	0.0450629	0.0131423		yebC	GCCTGAACAGGCAGGGCTATCTGGAGATATTTTT	34	6
388	0	0	0.0413831	0.00283192	0.152351	0.409351	0.427081	0.00384661		ftnA	ACAGCAACAAATATAACCTTTGTGGAGCACTATC	34	7
389	0	0	0.000155888	0	0	0	0	0		fliL	GATAAGCAGTAGCGACACAGGAAGACCGCAACAC	34	3
390	1.33379	1.30078	0.566859	0.383805	0.150883	0.0368203	0.0501314	0.000439874		nfo	GTTTTCCTCCAGCGGGTTTAACAGGAGTCCTCGC	34	1
391	0	0	0	0	0	0	0	0		csiE	ATTCTTATCAATTATGCTTATGGGAGATCTACAG	34	1
392	0.648933	0.366417	0.26417	0.275807	0.0972048	0.0491835	0.0384342	0.000957316		mltF	AGCTGGGACGCGCACGACACAGAGAATTAACTAA	34	1
393	0.188605	0.0352204	0.108371	0.0562387	0.00587468	0.00626647	5.30529e-05	0		yghB	ATAAAGGCTTAAACGCTGTTCCACAGGAAAGTCC	34	1
394	0.162995	0.199321	0.308432	0.0973655	0.0277095	0.0158305	0.00107825	0.000862403		exuR	AAATATAGTCTGCCGTATCATGCCTGGAGCGCAT	34	3
395	1.81085	0.888875	0.771105	0.446818	0.126734	0.12929	0.222137	0.000707267		dusB	GCCTTGCAGTCACAGTATGGTCATTTCTTAACTC	34	1
396	8.21806e-05	0.000177102	0.00608446	0.0072461	0.0090734	0.00439679	0	0		ppa	ACTTGTTTGCCACATATTTTTAAAGGAAACAGAC	34	5
397	0.000270659	0	0	0.0198323	0.0414224	0.114916	0.0919713	0.117668		argF	AATTCAATAAGTGGCGTTCGCCATGCGAGGATAAA	35	8
398	0	0	0	0	0	0	0	0		ykiA	ATCAAGGTTGATATAAATATCAGTGAAGATCTCCA	35	1
399	0	0	0	0	0	0	0	0		bioA	ACCTAAATCTTTTCAATTTGGTTTACAAGTCGATT	35	1
400	0.33719	0.503051	0.124325	0.13391	0.0348975	0.061346	0.000180013	9.49123e-05		rimO	CCTGACCTTTCCTGTAACTGAATATTTTTTAAGCT	35	2
401	0.353675	0.108502	0.119658	0.076071	0.0225409	6.33088e-05	0	0		dgcT	AAAGGGATCTACAACCTACAGATTGGTGTAGCTTT	35	1
404	0	0	0	0	0	0	0	0		yciC	CTAATTAACACCTGCATAAAACTCAAGGAGAGTGC	35	1
405	0.00940163	0.0882743	0.0590032	0.0195824	0.0204004	0.0234185	0.011392	0		msrB	GTAATGTGAGCACGATTAAAGTGAGATGTGAGCAA	35	2
406	0	0	0	0	0	0	0	0		mrp	AGCTGATGGTTTATCTATACAAAAAAGGAGTCGGG	35	1
407	0.0304568	0.0743586	0.0761216	0.0877804	0.0498918	0.0162118	5.30529e-05	0		yeiW	CATCAATCCGGTGGTTAACCTTAAGAGAACAACGT	35	4
408	0.0215483	0.125094	0.23234	0.359266	0.482436	0.404911	0.433392	0.246505		atoD	TGTACCCACAACGGTGTATGCAAGAGGGATAAAAA	35	5
409	0	0.0046714	0.0459964	0.0529226	0.0309258	0.000274799	0	0		glk	AAGAATTATTTTGACTTTAGCGGAGCAGTTGAAGA	35	4
410	0	0	0	0	0	0	0	0		xseA	AATAACCTGCTGATTTAGAATTTGATCTCGCTCAC	35	1
411	1.09433	0.955276	1.11489	0.909566	0.431166	0.140864	0.103426	0.342642		rlmJ	CGGGCCGATTTTTACTTACCGGAACACCTTTACCC	35	3
413	0	0	0	0	0	0	0	0		ivbL	AAATATTGTTAAACACAAAACCAACAAGGTCCCCA	35	1
414	0.115795	0.234398	0.224502	0.126039	0.25644	0.214722	0.0168287	0.000155137		ravA	ACGCAGAACTTTTGACGAAAGGACGCCACTTCATT	35	5
415	0.0197117	0.000466979	0.129294	0.121259	0.172968	0.111479	0.00506122	0		cpxP	GTTGAATCGCGACAGAAAGATTTTGGGAGCAAATG	35	5
416	0.68747	0.444442	0.38621	0.339764	0.121019	0.105146	0.000667	0		adiA	GCAACGAAGATTCCTTCATAACCGGGTAAGCAATG	35	1
417	0.00310321	0.0109192	0.00535861	0.110846	0.293103	0.515937	0.755652	0.0329428		ghoS	TCCCCAGAGCGTTTAATATTGATAGGAGTCATATT	35	7
418	0	0	0	0	0	0	0	0		yafN	ATATTCTGGTGTGCATTATTATGAGGGTATCACTGT	36	1
419	0.0222397	0.000402651	0.0642449	0.101182	0.227441	0.919517	2.35462	2.20886		prpB	CAACGCAAATAACAAGTTGATAACAAAGGATGGGCT	36	7
420	0.773401	0.58118	0.301695	0.0868654	0.0430895	0.00821025	0.000253921	0		dnaX	TCGTGAATCCACCTTCCAGCGTTTCAGAGCCTGCCA	36	1
421	0.00321933	0.000821183	0.0181608	0.0262125	0.0469369	0.00826554	0.000180013	0		adk	TCAAAAAATTCGACACATTTTAAGGGGATTTTCGCA	36	5
423	0.0636113	0.0801879	0.180946	0.18815	0.0461384	0.0260587	0	0		rsfS	CCATTTTTATCTATTTGATTCACCCAGGGGGAAAAC	36	4
424	8.21806e-05	0.000466979	0.027139	0.00435832	0.13994	0.814886	0.981542	0.327462		cmk	TTATGTTAACGGTACGCCTGTTTTAAGGAGATAAAG	36	7
425	0.0845164	0.181912	0.0543412	0.044043	0.0189517	0.00646718	0.00269836	0		pyrD	GCCCCCGGTTTGCACACCGGGAATCCAGGAGAGTTC	36	2
426	0	0	0	0	0	0	0	0		pyrC	GGCAAAAACATCCCTTCAGCCGGAGCATAGAGATTA	36	1
427	0.00223317	0.00109518	0.0459185	0.0685843	0.0954118	0.0357761	0.0115607	0		hns	AACAAACCACCCCAATATAAGTTTGAGATTACTACA	36	5
428	0	0	0.00676648	0.00156881	0.00197948	0.00216605	0	0		yddG	TTAATTTTTAACGGCAAGAGAGACAAAACAGCGAGC	36	3
429	8.21806e-05	0.0298272	0.0464349	0.000390522	0.142232	1.93744	6.02596	2.88968		gloA	CATTTTGAATCTGTTAGCCATTTTGAGGATAAAAAG	36	7
430	0.208496	0.355655	0.115488	0.122768	0.0617463	0.0163882	0.00664548	0		rcsD	ATCACTTCGCGAAGTTTTAACAGGTCATAAACACGA	36	2
431	0.000787861	0.000338324	0.00102788	0.000276726	0	0	0	0.000172481		fabB	GAAACTTACTCTATGTGCGACTTACAGAGGTATTGA	36	3
432	0	0.000177102	0.000720977	0.0123006	0.0337547	0.0963113	0.160019	0.0305975		recN	AATAACAGTAATGGTTTTTCATACAGGAAAACGACT	36	7
433	0.107037	0.113429	0.0463715	0.0272279	0.0446052	0.0704736	0.0302426	0		patA	CGGTATCATGTGATACGCGAGCCTCCGGAGCATATT	36	2
434	0	0.000354204	0.0001023	0	0	0	0	0		yhjX	GAGATTTTTCCTTTTTATTACTGCAGGAATACTGCC	36	2
435	0.020722	0.0161863	0.0325268	0.0289374	0.000229504	6.33088e-05	0.00792642	0		glyQ	TTCCTTTAAATCCACACGTATCCAGCACGAAATAAT	36	3
436	0	0.000177102	0	7.81045e-05	0	0.0317136	0.408168	0.234949		tatA	CTTTGTTTAATCATCATCTACCACAGAGGAACATGT	36	7
437	0.574144	0.519462	0.488029	0.537851	0.276064	0.110019	0.00154438	0.0216641		metB	GACATTTCACCGACAAAGCCCAGGGAACTTCATCAC	36	1
438	0.030974	0.17223	0.156998	0.131614	0.204052	0.165563	0.00634985	0.000172481		pgi	AAAGTCACAATTCTCAAAATCAGAAGAGTATTGCTA	36	5
439	1.98562	1.8231	0.970893	0.698366	0.215079	0.184564	0.0134234	0.000267393		cutA	CTCTCTTGCGGTTCCATCTGTTCTTGCGAGGTGTTT	36	1
441	0.411863	0.375913	0.22134	0.230971	0.183135	0.0226654	0.0313548	0		ylaC	GTTCCCTGGAAAGTTGCAGATACCACGAAGGCAAACG	37	1
442	0.00250383	0.0668703	0.171174	0.14956	0.362743	0.5427	0.389031	0.0646928		flgM	AACACATGATAAAAGCGCCCTCAATGAGGAATAAACC	37	6
443	8.21806e-05	0.000354204	0.0107221	0.00129881	0.0304938	0.30077	0.567217	0.546925		ycgZ	ACTTAACATTGATTAACATTTTTAACAGAGGCGTAGC	37	7
444	0.00795633	0.0902217	0.0989396	0.0840893	0.162419	0.0971277	0.0479713	0		uspE	ACAAACTGCGTTGACAGTTGTTGTAAGGAGACCCTGT	37	5
445	0.049922	0.234877	0.12281	0.121096	0.096258	0.00478742	0.00281581	0		hslJ	AATAGTCCTGAGTCAGAAACTGTAATTGAGAACCACA	37	2
447	0.0732693	0.356324	0.364288	0.317438	0.235754	0.253697	0.0225419	0		yecT	AGGGAAACGATAACGGTTGAATTTAAGGAATACCGCA	37	3
448	0.295367	0.248171	0.110246	0.101116	0.0383576	0.112749	0.0216169	0		mdtA	ATTCCGCGAAACGTTTCAGGAAGAGAAACTCTTAACG	37	1
449	0.422124	0.20436	0.160637	0.247041	0.011547	0.0252989	0.00108959	0.346637		gyrA	CTTTGAATCCGGGATACAGTAGAGGGATAGCGGTTAG	37	1
450	0.982557	0.540309	0.368424	0.286839	0.143809	0.300009	0.0984122	7.75683e-05		cvpA	CGAACAGGATGACAGGGCGTAAAATCGTGGGACACAT	37	1
451	0.0226559	0.0439517	0.30889	0.454418	0.512825	0.388189	0.187572	0.00103488		upp	GATTTTTTTTGTGGCTGCCCCTCAAAGGAGAAAGAGT	37	5
452	1.84926	1.26141	1.18621	0.814014	0.219881	0.158614	0.132512	0.184566		yfgG	CCGTCCACAGCGTGGGACATACTTCAAGGAACCTTTT	37	1
453	0	0	0	0	0	0	0	0		guaB	GCAATATTTATTAACCACTCTGGTCGAGATATTGCCC	37	1
454	0.726997	0.344432	0.283812	0.306093	0.0682266	0.271265	0.0307464	0		yfhM	CGACGTTGCTAACGGGCCATTGTGGCAGGGATGAAAA	37	1
455	0	0.0384115	0.0574541	0.188149	0.288671	0.31764	0.0202869	0		norV	CATCTTTTTAGAACACGCTGAATAAATTGAGGTTGCT	37	6
456	0.393697	0.344161	0.21414	0.230696	0.110339	0.0465176	0.0075986	0		yhdN	ATAGCTGTACTCTTTTTGTTCATCCCCTGGAGTATTT	37	1
457	0.0176331	0.00869711	0.0100498	0.00819008	0.0144891	0	0	0		malP	AACGTTGTGTTGAAAATCTAAGAAAAGTGGAACTCCT	37	1
458	0	0	0	0	0	0	0	0		xylE	ACTGATAAAAGATCAGAATGGTCTAAGGCAGGTCTGA	37	1
459	0.283028	0.143048	0.105394	0.0993222	0.0344034	0.00845408	0.00054004	0.000232705		mraZ	AATTGTGGGGCAAAGTGGGAATAAGGGGTGAGGCTGGC	38	1
461	0.00383301	0.0315497	0.108965	0.101366	0.103656	0.0205143	0.00123924	0		codB	GATTTTTTGGGTTTCAAACAGCAAAAAGGGGGAATTTC	38	3
462	0.157525	0.169768	0.289258	0.19885	0.0915755	0.0247507	0.0237621	0		lysO	GCGCATTTCGACTTCATCTTTGCAAGGACTGGGTTTTC	38	3
463	0	0.000354204	0	0	0	0	0	0		flk	AGGCATACTTGCGAAGATTTCAGGTATAAGGATACGTA	38	2
464	0	0.000354204	0.0127243	0.00125639	0.042248	0.273308	1.69855	3.32338		hmp	GAGATACATCAATTAAGATGCAAAAAAAGGAAGACCAT	38	8
465	0	0.000692528	0.00422843	0.00802715	0.0182137	0.00207178	0.00210527	0		agaR	AAACGAAATGAAACGAAAGTTTTACGAAAGGACTTACT	38	5
466	0	0.0248341	0.000155888	0.00250606	0.0934164	0.238973	0.450416	1.16709		yjhB	ACTTTAAGGGCTATATTAGAATAACACAGGAAACAAAT	38	8
467	0.0656604	0.0316967	0.262202	0.50887	0.873168	1.21848	0.999185	0.0187912		gntP	CAAAATAACAACGGTTCAACCAGGTAAGGTAAAACGTT	38	6
469	0.0145299	0.0286819	0.049046	0.354695	0.604257	0.261708	0.00629496	0.00101754		degP	CAGCAATTTTGCGTTATCTGTTAATCGAGACTGAAATAC	39	5
471	0.000787861	0.118146	0.171081	0.264643	0.674741	0.562801	0.161237	0		cstA	AATGTAACATCTCTATGGACACGCACACGGATAACAACT	39	5
472	0	0	0	0	0	0	0	0		dps	GTTAATTACTGGGACATAACATCAAGAGGATATGAAATT	39	1
473	0.348063	0.269298	0.152667	0.124501	0.00532164	0.000475508	0.000932264	0		gstB	CTGTTCAGCCTGTGGCTGCCTGTCGGAAAAGGGGTGAGT	39	1
474	0.310843	0.175114	0.140386	0.153165	0.0950819	0.0362895	0.0034733	7.75683e-05		mlc	ACAGATTATTTCGGAGCGCGAAAATATAGGGAGTATGCG	39	1
475	0.0778705	0.152598	0.327606	0.345392	0.336522	0.0600016	0.000106106	0.0448011		blr	CTGAAGTTAATGGATCAATCAAGAGAGATGTGGGCTGTA	39	4
477	0.000517201	0.04593	0.0184239	0.0273908	0.0414304	0.0718354	0.0204176	0.0133403		yegH	GTGACATTTGTCATACAACGAATAGGTTTTGTACTTACT	39	6
478	0.00476111	0.0110161	0.117773	0.258251	0.335695	0.642877	0.710773	0.0244484		grpE	AGTTAGCGAGATGAATGCGAAAAAAACGCGGAGAAATTC	39	7
479	0.248798	0.700066	0.816064	0.883712	0.587527	0.183381	0.0226271	0.000267393		cysD	CTGATGGCAAGAAAATAGCGGTATTGCAAAGGAACGGTT	39	4
481	0.12988	0.268716	0.364323	0.128266	0.101588	0.0231746	0.000274775	0.000327617		metR	CTCAAGCGCAAATTATTCATGCCGAAGTGAAGGACTTTC	39	3
482	0	0	0	0	0	0	0	0		yihI	AAATCTATACTGAATAAAACGGCTAAAAGACGAACCATT	39	1
483	0	0	0	0	0	0	0	0		serB	GTTATTTTCCCTGCTTCGAACGATTTTACAGGAGCCTTA	39	1
484	0	0	0	0	0	0	0	0		speE	GCCCTTTTTTTACGGGTGTTAACAAAGGAGGTATCAACCC	40	1
486	0	0.00405827	0.0643716	0.0966533	0.110656	0.0254391	0	0		tesB	ACTTTGGCTTGCTGCGGCAGCTTTGTTACTGGAGAGTTAT	40	5
487	0.853442	0.443331	0.255567	0.177089	0.0852753	0.010441	0.0403083	0		folD	ATCCCCTTCGATCTACGTAACAGATGGAATCCTCTCTCTG	40	1
488	0	0	0	0	0	0	0	0		ybhC	CAACGGATTCATTTTTCTATTTCATAGCCCGGAGCAACCT	40	1
489	0.035083	0.0375586	0.0838135	0.208326	0.080113	0.125895	0.217583	0.818078		rimJ	ACAGCGTATTAAAGACGTTACGGGAAGGAGTAGGTATAGA	40	8
490	0	0	0	0	0	0	0	0		acpP	AACCATCGCGAAAGCGAGTTTTGATAGGAAATTTAAGAGT	40	1
491	0	0	0	0	0	0	0	0		ansP	AACTTATATGACTTTTTCATTAAAGCAATCAGGGAGAGCA	40	1
492	0.925861	0.76331	0.440639	0.222904	0.0436346	0.0576658	0.0167756	0.00750339		hipB	ATATCCCCTTAAGCGGATAAACTTGCTGTGGACGTATGAC	40	1
493	0.00968658	0.0639532	0.00519785	0.0368751	0.04574	0.0737065	0.0174635	9.49123e-05		uxaB	ATTCAAACAGGTTGTATGACTAATCAGAAGGGAACCCATT	40	6
494	0	0.00618431	0.0191449	0.0252194	0.0409985	0.0257192	0.0945478	0		yegT	ATCGCGTACCTTACATTACCTGTCATGAAGGAATTAAAAG	40	7
495	0.233127	0.338172	0.314288	0.26314	0.096282	0.0239451	0.00570554	0.00118183		murQ	ATCTGCAATTATTTGATCGTAAATAGTAAGGTCACCACCG	40	2
496	0.108801	0.0262835	0.0598119	0.0613558	0.00790357	0.00337168	0.000159159	0		def	AAATAATCTTTCTAACTCCTGAACACATCTCTGGAGATTT	40	1
497	0	0	0	0	0	0	0	0		gmk	ATGTAGGCTTTATTTCGCTAATCACATACGAAAGATACTC	40	1
499	0	0	0	0	0	0	0	0		soxS	AGATGAATTAACGAACTGAACACTGAAAAGAGGCAGATTT	40	1
500	1.62597	0.717416	0.609201	0.398747	0.148062	0.0892271	0.0371668	0.637127		dgt	ATGCGCTTACGGGGAAGCGTATTTCTCACGCGGGAGAGGAC	41	1
501	0	0	0	0	0	0	0	0		phoB	GCATTAATGATCGCAACCTATTTATTACAACAGGGCAAATC	41	1
502	1.31809	0.87641	0.873585	0.240161	0.172573	0.0691441	0.035988	0.0470964		ybfE	CAGAGGCCTGGCTGATTGTTTCCCCCGAAGTCACCAAGATC	41	1
503	0	0.0429376	0.0102642	0.000432935	0.0170885	0.24379	1.24919	4.10278		pspA	AGCAGGACAATCCTGAACGCAGAAATCAAGAGGACAACATT	41	8
504	0.0190686	0.00897111	0.0237825	0	0.000278912	0.000264017	0	0		ydjM	AATCCTATACTGTACGTATCGACAGTTTAGTGAGTTTTATC	41	3
505	0.00738106	0.00488026	0.00272802	0.00102208	0.000278912	0.000898488	0.000413079	0		leuE	CTTTAATCGCGCATGATCGAAAGATAATTAAAGAGGTTAAT	41	1
506	0.00152749	0.000821183	0.000462788	0.000156209	0	0.00048629	0	0		amyA	ACGGCTACGCTTCTAATGTTCCCCTTGAATGGAGTCGAAGA	41	1
507	0	0.000466979	0.0244597	0.0999072	0.203749	0.459368	0.305712	0.00219022		bcp	GTCAATTATTCCCAACATGATGAACAGGATGGAGTTAAGTA	41	6
510	0.170898	0.166917	0.117188	0.124647	0.117212	0.000612907	0.000360026	0		argD	ATAATTTCACATTTGTTTATGCGTAACAGGGTGATCATGAG	41	1
511	0.000681563	0.0227081	0.0805547	0.129628	0.203857	0.0746265	0.0133667	0.000267393		treF	AAAGCCGATAATTAGCGACGAATTTCGGAGGTTGGATCCTT	41	5
512	0.0716686	0.0760653	0.103309	0.106894	0.132219	0.0385283	7.39074e-05	0		mnmG	CTTCAATCCATTTTCATACCGCGTTATGCGAGGCAATCACC	41	5
513	0	0	0	0	0	0.00114094	0.125058	0.0559146		dsbA	TTTGCAATTAACACCTATGTATTAATCGGAGAGAGTAGATC	41	7
514	0	0	0.0361414	0	0.0398924	0.264867	0.327368	0.335738		rhaT	GTCGGAGATGTGACGCGACGAAAAATGATGAGGATAAGAAG	41	8
515	0.0143512	0.0364316	0.214223	0.338514	0.311062	0.0560507	0.000528696	0.157286		fdhF	GAGAGCGCGTATGCGTGATTTGATTAACTGGAGCGAGACCG	41	4
516	0.878204	0.519753	0.571073	0.30689	0.0547209	0.0574853	0.140711	0.00492437		phnC	AATCCGCCACGATGGAGCCACTTTTTTAGGGAGGCTGCATC	41	1
517	0.04331	0.306473	0.412111	0.553932	0.578485	0.136187	0.000200868	0.175279		thrL	ATAGCGCACAGACAGATAAAAATTACAGAGTACACAACATCC	42	5
518	0.0151435	0.0347709	0.0640939	0.0302987	0.335764	1.06968	1.73423	5.259		carB	GCAGTACCGTAAAACCGCTAAGTAATCAGGAGTAAAAGAGCC	42	8
519	0	0	0	0	0	0	0	0		fhuA	TCTCGTTTACGTTATCATTCACTTTACATCAGAGATATACCA	42	1
521	0.00348999	0.0339498	0.0791224	0.270712	1.43382	1.61298	0.656781	0.933618		proC	AGCGATTATCAAAACAATGAATTTCACGGCAGGAGTGAGGCA	42	6
522	0.0397906	0.0913001	0.217501	0.250355	0.175785	0.223934	0.0182234	0.000172481		fadM	ATGACCTCTGTACTTATAACAACAACGTAAGGTTATTGCGCT	42	4
523	0.104059	0.564104	1.50725	1.61736	2.3687	0.978378	0.367004	0.000387842		glnK	CGTGTAGCAGAACCATTACCGAATTCTGACCGGAGGGGATCT	42	5
524	0.0735632	0.477231	0.615929	1.00346	0.950868	0.847454	0.343061	0.000457218		purE	CTCTAAAGCCGAGAGTTGTGCACCACAGGAGTTTTAAGACGC	42	4
525	0.100008	0.00127228	0.0817188	0.0380244	0.0398318	0.00784256	0.000180013	0		aroG	TATTGCATTCACTAAGATAAGTATGGCAACACTGGAACAGAC	42	1
526	0.00220905	0.00528211	0.0308851	0.0182055	0.379986	1.87174	2.911	2.23246		bioB	TACACCGAATTAACAACAAAAAACACGTTTTGGAGAAGCCCC	42	7
527	0.432411	0.560972	0.188648	0.10853	0.0521772	0.132761	5.30529e-05	0		ldtB	TTCTCAACCCAATGGCCTGCCAGGCACAAAATCTCGCTTAAC	42	2
528	0	0	0.0263595	0.0039678	0.0063066	0.00785334	0.000200868	0		aldA	TGTATTCACCGAAAACAAACATATAAATCACAGGAGTCGCCC	42	3
529	0	0	0	0	0	0	0	0		malX	CAATTTACTGAATCCAGATTGTTCTCTACGAGGAGTCGTTTT	42	1
530	0	0	0	0	0	0	0	0		htpX	ATCGCATATTGCGTTTTGTTAAACTGAGGTAAAAAGAAAATT	42	1
531	0.712558	0.570747	0.507505	0.236259	0.185456	0.111188	0.139033	0.146269		nudB	TATGTGAATGGGATGAGCGAAGGCAGTCAACGAAGAGGCAGC	42	1
532	0.44431	0.232543	0.231833	0.101505	0.0884071	0.0210705	7.39074e-05	0.000517442		azuC	AAAGACAATAACACCTGTATAACAAATGGTCGGAGTGCCGCG	42	1
533	0	0	0	0	0	0	0	0		osmF	TTAATTCGCTGAAAACAACAGTAAAAGAATGAGGAAAGCATC	42	1
534	0.094856	0.133977	0.067767	0.107131	0.0306883	0.000538817	0.000413079	0		galS	AGCAAGCAGTCATTTACTGCAATCTCATAACAGGTAGTGAAT	42	2
535	8.21806e-05	0	0.0002046	0.00883716	0.00658551	0	0	0		fadI	TCAGGTCAGACCACTTTATTTATTTTTTTACAGGGGAGTGTT	42	4
536	0.00651102	0.00368819	0.00381923	0.0817462	0.21014	0.1031	0.000392225	0.00237185		glpD	AACGAACATTTATGAGCTTTAACGAAAGTGAATGAGGGCAGC	42	5
537	0.0367213	0.237231	0.297052	0.332398	0.291012	0.305836	0.281884	0		pdeH	TCGAGTCCGGGCAGCATCACTTTTAAACACAGGACATCTTTG	42	4
538	0.00133901	0.000579754	0.000569964	0.000589144	0	7.40908e-05	0	0		xylA	ATCATCCATCACCCGCGGCATTACCTGATTATGGAGTTCAAT	42	1
539	8.21806e-05	0.0128197	0.0671386	0.0731723	0.120802	0.0249716	0	0		fadB	ATCTGGTACGACCAGATCACCTTGCGGATTCAGGAGACTGAC	42	5
540	0.011533	0.0804652	0.026267	0.0774639	0.0671476	0.0106942	0.000274775	0		pyrH	AGTATTAATTCATTTCAATCGTTGACAGTCTCAGGAAAGAAAC	43	2
541	0.00219922	0.0126585	0.136752	0.292235	0.231016	0.29728	0.364739	0		ykgR	GGCACTTACGAAGTGCACTCTTTTTTAAAGCGAGGAAGTACCA	43	7
542	0.175882	0.0990458	0.105102	0.194759	0.11135	0.00267252	0.000752251	0		cyoA	ACACTTTAAACGCCACCAGATCCCGTGGAATTGAGGTCGTTAA	43	4
543	0	0	0.0001023	0	7.65014e-05	0	0	0		yajG	GAATTTTTACCAAACACGCTTAAGAGTCTCTGAGAGCCCGAAC	43	3
544	0.00834311	0.00692528	0.157816	0.0138627	0.210647	1.27003	1.88727	2.70519		putA	GATAACGTTAAGTTGCACCTTTCTGAACAACAGGAGTAATGGC	43	8
546	0.0151873	0.103654	0.335683	0.41115	0.625067	0.534822	0.421788	0		ydgK	TAAAATTAGATTTGCCTGTTTGCGTCGCTATTCTGGAGAACCT	43	5
547	0	0.00144938	0.113871	0.105933	0.436883	0.0815407	0.0174371	0		yegR	AAACACTAGAGAGTGTCGTTGGTATTTAATGGGGGAAGGTGAG	43	5
548	0.515673	0.477649	0.294631	0.213046	0.053924	0.135385	0.0779643	0		rlmD	GGGACAATTAAGGTCACACTGTTAAATTGAGAAAGTCTCGCCA	43	1
549	1.5256	1.09312	0.585375	0.307795	0.0567657	0.11801	0.0489796	0.00595106		ppdA	AACTGGCCCTCGTCTTTTTTTCTCCTCGCTCCATACTGCCGGC	43	1
550	0.0188658	0.0248667	0.0447396	0.0270985	0.0134595	0	7.39074e-05	0		chiA	GTAGGACTTTTGTTTTGCAGTTTTTACGTCACAAGGGATTATA	43	3
551	0	0	0	0	0	0	0	0		pstS	GTAGCCAACAAACAATGCTTTATGAATCCTCCCAGGAGACATT	43	1
552	0.0337146	0.0646307	0.107991	0.0627508	0.00356689	0	0	0		idnR	TTTCGGGGGAAGATTGAAGATTCCCCCGACGTTGGGAGAAGTT	43	3
553	0.00458246	0.00516933	0.172119	0.108213	0.37445	0.262123	0.0546606	0.000707267		rob	ACCTGATGTCAGGTGCTCGTTGTTGAAAGGATGAGGATATTTT	43	5
554	0	0	0	0	0	0	0	0		mscK	GACTTTTTCAGGTCGTTCTTCAGGTTCAGAAACCTTCATTCATC	44	1
555	0.00378477	0.0239963	0.113476	0.111516	0.116046	0.260379	0.154607	0.000155137		ybfG	TCCTCATCATAAATGACACCGTAGCACACAAGGAGCAAGTAGCG	44	6
556	8.21806e-05	0.000289877	0.00900246	0.0382209	0.0814136	0.0231611	0.108389	0		lolA	AGAGGGAACTCCCGATCGGGAGTGACGTAATTTGAGGAATAATG	44	7
557	0.733131	0.220884	0.17568	0.0803626	0.0214985	0.0278327	0.0384269	0		ycdZ	GCTCGATCTCATTCATGGCCGCGTTTTCTGCTATCATGCGCGGC	44	1
558	2.23744	1.19129	0.985785	0.489591	0.281589	0.174682	0.00681598	0.00103488		plsX	CCCCAGGCAACTGGGGAAAGACCAAACCGGGCGGCGACGATACC	44	1
559	1.07225	1.40653	1.19974	1.92059	0.837482	0.182281	0.0754646	0.0681443		ycgB	GAGGTGCTCCACACAGAGAGCGCCGACAACAATGAGGTGCGCGT	44	4
560	0	0.041134	0.0209132	0.0124636	0.162905	0.220941	0.24593	0.0046141		azoR	AAGCAACGGGGCATCGCCCATTCAAACATCTATAAGGAAACACC	44	7
561	8.21806e-05	0	0.000258188	0.00121398	0	0	0	0		preT	ACTAAACGCTCGCCTTAATTACCTATAGCATTAAGGAAGATCAC	44	4
562	0.0598497	0.00468648	0.00882223	0.0239408	0.00210061	0.000274799	0.0284581	0		purM	GAATTTTATTTTTCTACCGCAAGTAACGCGTGGGGACCCAAGCA	44	1
563	0.0265175	0.0929433	0.305022	0.26521	0.305612	0.0340817	0.000159159	0.0924694		bacA	TAGTTCGGACAAGCGGTACATTTTAATAATTTAGGGGTTTATTG	44	5
564	0.00612423	0.174162	0.297471	0.320618	0.188516	0.162887	0.0777382	0.0801312		aer	CTGACAAGAAGTTAACAACCATATAACCTGCACAGGACGCGAAC	44	4
565	0	0	0	0	0	0	0	0		nanA	AAAGGTATATCGTTTATCAGACAAGCATCACTTCAGAGGTATTT	44	1
566	0	0.00478337	0.00453534	0.00357728	0.0717314	0.218169	0.412367	0.550771		ecnB	TGCTATAGGCAAACATAAATAACATTACCTAAAAGGAAGACGTT	44	8
567	0.0455619	0.04904	0.0305588	0.0775151	0.0666201	0.000338108	0.0188959	0		fepD	ATAAGATCGATAACGATAATTAATTTCATTATCATGGAAGTTCGT	45	4
568	0.0837285	0.0215343	0.237586	0.11018	0.933829	3.82592	1.20626	0.0490958		asnB	AAGCAAACACAACAAGCAACAAATACCAGGTTAACGGAGAAGGTT	45	6
569	0.874665	0.473287	0.376384	0.303973	0.0508799	0.0161335	0.00575859	0.000707267		seqA	ACTCCTGGCGACTTGTATTCAGCTAAGACACTGCACTGGATTAAG	45	1
570	0.0831542	0.149023	0.121504	0.190303	0.153765	0.0299072	0.00124875	0		ychJ	ACTCAGGCGGTTAATACGCCGTTATTGTTTCCAGGGAGATTATTT	45	4
571	0.00119876	0.000177102	0.061629	0.0220037	0.16061	1.7218	1.77717	1.46437		nac	AAGTAATGGCGGCACTTGGGCCGATTCTTAAAAACCGGAGGCAAC	45	7
572	0	0.000177102	0	0	0	0	0	0		yfcZ	AACGTTTATCTGGCACCTTGGGTGCACATACAGAGGAAATCAACG	45	2
575	0.610842	0.357554	0.329657	0.262092	0.0130818	0.000538817	0.00630814	7.75683e-05		chpS	CTGTAGCACCGTGAGTTATACTTTGTATAACTTAAGGAGGTGCAG	45	1
576	0.00035284	0	0	0.0479172	0.252109	0.401768	0.131638	0		yeaR	GCTGGAATAAACCGTTTTCAGCGCATTCACCGAAGGAGGGAAAAGG	46	6
577	0	0	0	0	0	0	0	0		purL	GTTTCCCCCCCTTGGGTACACCGAAAGCTTAGAAGACGAGAGACTT	46	1
578	0	0.00169081	0.00844712	0.0636188	0.0645689	0.103741	0.322496	0		talB	AGACCGGTTACATCCCCCTAACAAGCTGTTTAAAGAGAAATACTATC	47	7
579	0.144788	0.14174	0.0880177	0.07126	0.0359414	0.0120345	0	0		entS	GCAGCCTAAGAATAGGTATTTAAAATATTTGATGGCAAGGCATTGTA	47	1
580	0.0196054	0.172842	0.383531	0.877199	1.33554	0.702361	0.463288	0.000647042		pfkB	TTCCGCTGATTCGGTGCCAGACTGAAATCAGCCTATAGGAGGAAATG	47	5
581	0.0749942	0.0528585	0.0566795	0.0588968	0.0750592	0.0320058	0.0140714	0.00176769		ves	ACGGTTACCTGAACGATAACAATGAAAAGAACGGGCCGGGAGCGAGT	47	5
582	0.115882	0.119403	0.135242	0.199401	0.134247	0.0381363	0.00265666	0.0782513		uvrY	AATGACTAACTATCAGTAGCGTTATCCCTATTTCTGGAGATATTCCT	47	4
583	0.051353	0.273818	0.32369	0.272763	0.551044	0.355638	0.0634414	0.00488053		dapE	GTTTCAGTGATTCCAGTTATCAGCAATTTTTCCATGAGGTGTAGTCT	47	5
584	0	0	0	0	0	0	0	0		nfeF	CGAGTTTTATTTAGATATATCTGATTACCATCACGAAGGCGATAACA	47	1
585	0	0	0	0	0	0	0	0		yiaG	GCTTCGATGCAATTCACGATCCCGCAGTGTGATTTGAGGAGTTTTCA	47	1
586	1.74128	1.50132	0.939682	0.551988	0.117436	0.182266	0.190068	0.798312		ilvY	AACGTCACATTGCAATTTTTGCAACGTCAACATCGAGGGCTGTCCCT	47	1
587	0.33513	0.106618	0.0878911	0.0505283	0.0205215	0.000274799	0.00169403	0		fecI	CTCATATTAATATGACTACGTGATAATTAACTTTTGATGCACTCCGC	47	1
588	0	0	0.0001023	0	7.65014e-05	0	0	0		aceE	GACAGGTTCCAGAAAACTCAACGTTATTAGATAGATAAGGAATAACCC	48	3
589	0	0	0	0	0	0	0	0		araJ	TTATTGGCTACGGTGATTGGTAGCCGTTCTGGTGGTTGTGATGGTGGT	48	1
590	0	0	0.0001023	0	0	0	0	0		allD	TATGTTAATTGCAGTCATGCTTCACACCGTCGTTAAAAAGGAAGACAG	48	3
591	1.08125	0.475448	0.346362	0.185892	0.0464858	0.0397096	0.000180013	0.0982316		sohB	CTGTTGTAAACTGTGAGCCAAAGCGTTGTTTAACCAAGGTGGGGACTC	48	1
592	0.179309	0.129986	0.14325	0.257962	0.023027	0.0601362	0	0.000802179		ycjX	CCTTACGAATGATTTTTTTTCTGGTCTTCAGAGCAGCACAGGACAGCA	48	4
593	0.314173	0.564047	0.442719	0.346317	0.164402	0.0307841	0.0434274	0.0220766		ogt	TGCCGATAGGTCCGGGTATTTACCCACGTTTGTCTTAAGAGAGAACGG	48	2
596	0.00479506	0.000225549	0.0582336	0.0943416	0.231489	0.303478	0.17022	0.0834676		ucpA	CAGAGGGAATGGAGTGTAACGCTCTGTATTAACAAGGAGAGCATTAAA	48	6
597	0	0.000177102	0	0	0	0	5.30529e-05	0		pncC	GAAAGTGCTATCTTGTCCGGCATAAATTTTTGACTGACAGAGGTTGTG	48	2
598	0.0224523	0.233492	0.182441	0.221762	0.244128	0.183697	0.0415761	9.49123e-05		ascB	CGTACAACCGACCGTCGCCAAAGAAGTAAGTCTTAATTGAGGATGAAA	48	5
599	0	0.00674818	0.0489437	0.147269	0.235298	0.0147515	7.39074e-05	0		kbaZ	AAACAAAACGAAAGATTAATATCGCAGTAATCTGAACTGGAGAGGAAA	48	5
600	0.608757	0.402144	0.315018	0.146197	0.0435931	0.00944823	0.0104144	7.75683e-05		selA	TTAAACGCCCTTCTCCGTGTGAGAGGGCCTTGATCAGCCAGGTTTCCT	48	1
603	0.185626	0.937703	0.641928	0.892962	0.986886	0.363187	0.0476306	0		malK	ATCATGAATGTTGCTGTCGATGACAGGTTGTTACAAAGGGAGAAGGGC	48	5
604	0.112692	0.634286	0.431929	0.290482	0.470931	0.0770403	0.112652	0		yjeI	ACACGGACGACGCGAGTGGCGTCCAGCTCATTGATTATGGGGAATAAC	48	2
605	0.000246542	0.0498771	0.101746	0.12606	0.119521	0	0	0		lpxC	GAATGTATAGTACACTTCGGTTGGATAGGTAATTTGGCGAGATAATACG	49	4
606	0	0.000112775	0.0449539	0.0853881	0.199126	0.0775979	0.0227844	0		yacL	AATGGCGCAATGCGATTTCGGTGCATTGCCGGGAGCAGAGGAACACACT	49	5
607	0	0	0	0	0	0	0	0		erpA	ATTATTGGGTTAGAATTTGCCCAATTGCCGATGTCGTTTGGAGCAAAAT	49	1
608	0.714833	0.580155	0.637919	0.388501	0.0739228	0.0488493	0.116978	0		efeU	ACTTTTCTTTGCATAGATTGACTCAGAAAAACGTTTAAGGGTGGGTGGC	49	1
609	0.0566018	0.0677383	0.0826494	0.0890414	0.0221042	0.028641	0.126796	0.099531		grxB	CTGACTCCTTCATACTGAAAGTGAACTGACAGCCAAATGGAGGAGTCAC	49	7
610	0.0114463	0.00415517	0.119273	0.147318	0.316839	0.742933	0.843132	0.0745261		treA	CTGATACTTGAATACCGTTTTATTCGGTTTCGCCAAAGGAGAATGATTG	49	7
611	0.0173142	0.00123971	0.0800528	0.000276726	0.0341627	0.194459	4.1934	12.682		asr	AACGGCCCCGCAGTGGGGTTAAATGAAAAAACAAATTGAGGGTATGACA	49	8
612	0.168268	0.205243	0.155366	0.395711	0.190839	0.0250955	0.0471586	9.49123e-05		ppsA	GCAGAAATGTGTTTCTCAAACCGTTCATTTATCACAAAAGGATTGTTCG	49	4
613	0	0	0	0	0	0	0	0		hisJ	AACAAACCTGTAAATATTCCCTATAAAAAGACTGTCAGTTGAGGACATT	49	1
614	0.225624	0.0553062	0.0978921	0.120351	0.0143042	0.0351284	0	0		tsgA	CTCGCGGCATATCCCGCTATGCCATTTTATTTTTGAACGCAGGCCAATC	49	1
615	0.207833	0.297849	0.160466	0.0566763	0.0226907	0.0503325	0.0736341	0.028931		yzfA	ACAGAATGCGAGTCGTCTCGCAAAAAACAACGCCACCCGAAGGTGGCGT	49	2
616	0.226723	0.153146	0.388573	0.228345	0.140623	0.0240825	0.00685952	0.249174		psiF	AGATCACGGGCGCATACGCTCATGGTTAAAACATGAAGAGGGATGGTGCT	50	3
617	0.000928104	0.226388	0.160189	0.366768	0.722055	1.22155	1.99353	0.397412		qmcA	TCAAGCAGCAATTTTGCTGATTATGGACGGTACAACAGGAGGTTTTTCCG	50	7
618	0	0	0	0	0	0	0	0		fes	TATATTTCTGCAATCAATGAAAAATTGCACAGTAAACATGGGGTTATGGT	50	1
619	0	0	0	0	0	0	0	0		wrbA	AGTGGTAGCGAATCGCTACGGAATAGAGATAACACGAGGAGTGGTTAGAA	50	1
620	0.00035284	0.0241892	0.294627	0.314943	0.611316	0.334137	0.0854945	0.000284737		acnA	TCACCCTGAAGAGAATCAGGGCTTCGCAACCCTGTCATTAAGGAGGAGCT	50	5
621	0.00097634	0.000708408	0.021868	0.00223606	0.00435421	0.0941975	1.66061	6.43497		gstA	GTTCAGCAACGCACTACCATACTTTAAACCACAGACAAAAGGAGTTACCG	50	8
623	8.21806e-05	0.000177102	0.0263108	0.00432263	0.189783	0.853689	1.70365	0.141472		raiA	AGGAACGGTATGCTGAATTCACCAAGACGGGAAGACAAGAGGTAAAATTT	50	7
624	8.21806e-05	0	0.00530015	0	0.0133686	0.171581	0.502784	1.79288		recA	CAACAGAACATATTGACTATCCGGTATTACCCGGCATGACAGGAGTAAAA	50	8
625	0.515402	0.0843757	0.161757	0.0197386	0.000809642	6.33088e-05	0	0		yihG	GGTCGTTTTCTGCTAAAATCTGCGCCTTGCGCTTCTTTAGCGCACTGTCT	50	1
626	0.00146942	0.0114505	0.0183265	0.00337866	0.131222	0.873963	0.448773	0.334809		ulaG	AAACCAATCACATATTGATTCGAATTGAACTATCATGAAGGTAAATGGCG	50	6
627	0.10009	0.216988	0.123253	0.0654534	0.0457256	0.25535	0	0		fecA	TTCTCGTTCGACTCATAGCTGAACACAACAAAAATGATGATGGGGAAGGT	50	6
629	0.0222781	0.0345136	0.759408	0.673758	1.47662	1.1719	1.06513	7.75683e-05		artJ	ATGCCGCAGACACGGCCAAAAATCATAAGATTGACAGACGGGAGTTCCATC	51	5
630	0	0	0	0	0	0	0	0		ssuE	AATTGTTATCAATGTTAACAAAAAAAGAACAATTGGTTATAAGGAGAGAGT	51	1
631	0.399307	0.505749	0.662885	0.652328	0.476769	0.00548105	0.0475867	7.75683e-05		pyrF	GTTTACCTGTTTCGCGCCACTTCCGGTGCCCATCATCAAGAAGGTCTGGTC	51	3
632	0	0	0	0	0	0	0	0		ynaI	GCCAGGGGTTTCCGGCATGACGACAATTATCTGGAGGAGCCTGATAAAACA	51	1
633	0	0	0	0	0.000355413	0.000686998	0.000667	0.000189825		aroF	ATCCTCGCTGAGGATCAACTATCGCAAACGAGCATAAACAGGATCGCCATC	51	6
634	0	0	0	0	0	0	0	0		yfiR	ATTCTGAAAAAATATCGATGCATTTCGAGCGAAGATGGTGGGGATCCCTGA	51	1
635	0	0	0	0	0	0	0	0		fucU	ACCGTTATTTCTACCCGCAAACTGAACCTGAATTTATAGAGGAAGTGTGAA	51	1
636	0.000599382	0.00903463	0.0325463	0.210174	0.36741	0.209483	0.0824836	7.75683e-05		yraR	TGGTGCATGAGCCGTGGAGCGCAAGGCAGACAATTCTGTAAAGGAGCGAAG	51	5
637	0	0	0	0	0	0	0	0		sfsB	GACAGAAGAAGTGTTCTGAATGAAAGCGACTAACTTAAGGAGTGAGGAAAA	51	1
638	0.088127	0.274819	0.400576	0.448158	0.460979	0.207868	0.0334297	0.173393		nikR	ATTACCCGCATTCCCCGTGCGCCGTCGCACCACAGAAAAGGTTTAACGCAA	51	5
639	8.21806e-05	0.000177102	0.0181803	0.0275558	0.0788811	0.00489248	0	0		hdeA	GTCGAAATTGATTCGTGACGGCTCTTTCACTTTATAGTTGAGGATATTACG	51	5
640	0.00446633	0.0130937	0.00226523	0.0014126	0.00430481	0.0508578	0.248718	0.313251		dctA	GCAGGTACCCCATAACCTTACAAGACCTGTGGTTTTACTAAAGGACACCCT	51	8
641	0.0011407	0.0242059	0.043926	0.0128965	0.229055	1.03172	2.051	2.58667		sodA	ACTGCTTACGCGGCATTAACAATCGGCCGCCCGACAATACTGGAGATGAAT	51	8
642	0.00132918	0	0.0146095	0.00447884	0.0193788	0.0172665	0	0		yahO	AACCCAATAATGTGGGTGGGTGATAGTGTGATAACAACTCTGGAGCCGTAAT	52	5
643	0.294296	0.242433	0.385177	0.662215	0.374094	0.0611638	0.0489346	0		ycbK	GTGCGCCAGAAGTGCATATAAACGATAACATTGACCTGTAGACTTGATTATC	52	4
644	0.000870041	0.000177102	0.0133137	0.00487608	0.117535	0.754959	0.540307	0.0216285		galU	CGATACAGAAATATGAACACGTTCAAAACACGAACAGTCCAGGAGAATTTAA	52	6
645	0.000599382	0.0358502	0.0666758	0.209493	0.185924	0.0321742	0	7.75683e-05		tcyP	AACACTATGACTGCTACGCAGTGATAGAAATAATAAGATCAGGAGAACGGGG	52	4
647	0	0.000112775	0.0394151	0.0375961	0.149192	0.499314	0.753986	0.00451918		dkgA	CACAACACCTCACCGGAGCCTGCTCCGGTGAGTTCATATAAAGGAGGAACGT	52	7
648	0	0	0.0001023	0.000432935	0.000913237	0.000338108	7.39074e-05	0		yieE	AGTAAATGATTACTCTTGTATTCATAATGGACCATTAAGCATGGAGCGAAAA	52	5
649	0	0.000289877	0.0866391	0.0346726	0.0728725	0.0267401	0	0		ychH	ATAAGGAAGAGGGGTATTCCCTGTTACAACCCAGAAAGTTCCGGAGGTGACAT	53	3
651	0.341932	0.430218	0.385187	0.373922	0.183151	0.0479386	0.00496463	0		ynjH	GCCACCCGGCTACCGTTATCAGTAGCAGAGACAATAACGTTAAGGAGTTCCCT	53	2
652	0.0286488	0.259276	0.301067	0.272284	0.165553	0.0300822	0.00152536	0.0147895		yqhD	CATCAGGCAGATCGTTCTCTGCCCTCATATTGGCCCAGCAAAGGGAGCAAGTA	53	3
653	0.345861	0.786148	0.584586	0.629551	0.132395	0.369544	0.00441508	0.000267393		gntK	CCGATAACAGTTACCCGTAACATTTTTAATTCTTGTATTGTGGGGGCACCACT	53	2
654	0.0236948	0.0242218	0.216361	0.508265	0.838462	0.459532	0.155574	0		yiaF	GTCAGACACGCGTGTGTCGTTGTGCGCTTTTTTTGGGTGAAAGGAGTAAGAAA	53	5
655	0.0727119	0.188782	0.13173	0.0827015	0.0376515	0.0265679	0.0422299	9.49123e-05		cytR	ATGTGAAGTAAACATGGATGTAGTACGCCTGACGTGCCAGGCGAGGAGTGAGT	53	2
657	0	0	0	7.81045e-05	0	0	0	0		ulaA	ACAACATTCCGGGTGTGTGGAATACCCGGTTACCTCTTCTTCAGGAGATCGTT	53	4
660	0.28923	0.435101	0.397595	0.607676	0.188407	0.0128387	0.00774458	0.0662326		bhsA	ATCGATCGTTAAGTAATTGCTTGCGACGTCATTCATCTGCATAAGGCCACTATT	54	4
661	0.00389107	0.0161688	0.0658233	0.379221	0.860904	0.756238	0.618714	0.103082		bluR	AGTATTATTGGGTCGTGTACAGGCGACGGAGATTTGTGACCGCAAGGAGGAATT	54	5
662	0.000517201	0.00086963	0.0353036	0.00113588	0.0821212	0.368477	0.521565	0.0694977		hxpB	AATCATAAGCACGGCTTAATACCTTACACATAATGCTCTAAAGGAGAGGTTGTA	54	7
664	0	0	0	0	0	0	0	0		hdfR	AGTGTAAAACAAAACATTTAAATCATAACGACAAATAATTTTGCGGAGAGCACT	54	1
666	0.0470993	0.0779007	0.101824	0.0908668	0.0894367	0.0877395	0.120964	0.000784835		hflD	GTCTGCCGCTGCCGGTCTGATTATTATCTTTACTTAAAACAAGGAAGCAGTGAAC	55	7
668	0	0	0	0	0	0	0	0		sodB	ATACGCACAATAAGGCTATTGTACGTATGCAAATTAATAATAAAGGAGAGTAGCA	55	1
669	0	0	0.00258188	0.0787782	0.095187	0.0731242	0.252923	0.381992		fliD	TCAGACCGATAACCCCGGTATTCGTTTTACGTGTCGAAAGATAAAAGGAAATCGC	55	8
670	0.589567	1.45295	1.04912	1.27313	1.69635	0.58019	0.0431833	0.327959		glcD	AGAAGCAGCGCGCAAAAATCAGCTGCCACACAACACAACAAAGCGAAGCCTACTC	55	5
671	0.00035284	0	0.0460013	0.087321	0.107061	0.0001374	0	0		rpoN	GACTCTGATAGGGTAGAAGTTTGCGACGTTTTAGCAGGAGAGTACGATTCTGAAC	55	5
672	0.00297279	0.0094214	0.0710747	0.0678923	0.0529805	0.0001374	0	0		fldA	ATCCGTGGGCAATTTTCCACCCCCATTTCAATAAGTTTCAAGAGGTTATTTCACTC	56	3
673	0	0	0	0	0	0	0	0		ybjP	GGATATCATTATTATCGTAGAACGCTTTCAGAGCGATCGCTTATAAGGAAATCATT	56	1
674	0.15879	0.0773042	0.141813	0.0900858	0.0436425	0.000602125	0.0039376	0		lolB	GTAACGCTAGCATTAAGGGTTATAACTGCAACGTATCTCAAGGACTTGTCATCACT	56	1
675	0.00223317	0.00301154	0.00283032	0.00610351	7.65014e-05	0.00960443	0.109203	0.0157468		ycjG	ACAGCAAACGCTATTTGCGCTTAATCCGCAGACCACCGCGACAACAAGGAGTAAAG	56	7
676	0.0836267	0.0147202	0.0738613	0.00523091	0.222333	1.30815	3.1786	3.8202		gnd	GAACATTCCAGGCCGCGAGCATTCAGCGCGGTGATCACACCTGACAGGAGTATGTA	56	8
677	0.115356	0.0905933	0.0364045	0.1057	0.039062	0.00244085	0	0		prlC	ATTATGTAAAGCGCCTGTTGAGCGCTTCCTTAACCTCTTTAACCAGGACTGCGCGA	56	1
678	0.0209301	0.563292	0.622623	0.484201	0.669108	0.298264	0.0909786	0.210768		trpR	AGCGAGTACAACCGGGGGAGGCATTTTGCTTCCCCCGCTAACAATGGCGACATATT	56	5
679	0	0	0	0	0	0	0	0		ecpR	CTTCCGGTTTACTAAGGAAACTGAATGCACCTGTAAAAATTACAGGTTTGGAAAGTA	57	1
681	0	0	0	0	0	0	0	0		narG	AAACATTAGCAATGTCGATTTATCAGAGGGCCGACAGGCTCCCACAGGAGAAAACCG	57	1
682	0	0.00368819	0.00340516	0.00432263	0.00053073	0.015786	0.995796	3.34302		yciG	GTGTCGACACACAACACTCATATTAATGAAACAATGCAACGCAACGGGAGAAATAAC	57	8
685	0.45064	0.25644	0.187362	0.157353	0.0368148	0.00733332	0.00542709	0.242576		menA	ATCATTTTCATCATTGTTTGATGGGGCTGAAAGGCCCCATTTTTATTGGCGCGTATT	57	1
686	8.21806e-05	0.0316935	0.0375395	0.114344	0.79816	1.43183	1.28889	0.566463		mpl	CTCACTTGCCCGACATATGCGTAAAATGAGCGGCAGATTAAAAAAGGATAGTGACGT	57	6
687	0.0103342	0.165917	0.0800139	0.211341	0.194025	0.0109569	0.012876	0		idlP	ACAGGATTCAGGCCTGTCTCAGACTGACATGGATGTAATGAACAAAAGGGAATGGCT	57	4
688	0.346329	0.21236	0.0442281	0.0284041	0.0183843	0.00942113	0.00096263	0.13787		pdhR	ACAGACATGAAATTGGTAAGACCAATTGACTTCGGCAAGTGGCTTAAGACAGGAACTC	58	1
689	0.52054	0.183599	0.190616	0.200265	0.0224644	0.00379328	0.0175033	0		frr	ACTTCCACTGTGTGTGACTGTCTGGTCTGACTGAGACAAGTTTTCAAGGATTCGTAAC	58	1
690	0.000164361	0.00283444	0.00381436	0.0037759	0.000251818	0	0	0		yafD	ACAGTAGAACCCTCCCGAGTGCGGAAGGGTTGACGTAATAGAGGTTTCAAAGTCAAAA	58	3
691	0	0.193117	0.118172	0.154059	0.403315	0.249434	0.0914718	0.293522		phoE	GTTTTCAACGGGACTCTCCCGCTGAATATTCGCGCGTTAATTAAAATCAGGAATGAAA	58	5
692	0	0	0	0	0	0	0	0		pncB	GTTCCTGAAGATGTTTATTGTACTAAACGCTCCTGTACGAGGACGCTACTGCGCACCT	58	1
694	0	0	0	0	0.00218189	0.00289479	0.000740907	0		mgtS	TTGAGATGAAAATTAAGGTAAGCGAGGAAACACACCACACCATAAACGGAGGCAAATA	58	6
695	0.0246613	0.0572543	0.0780848	0.0614075	0.0478119	0	0	0		ydgA	AGGCTTATAACACCTTCAGGCGGCCAGTCCGCCTGATTTCATTTTATGGATAATCATT	58	3
696	1.69565	0.940852	0.808552	0.648523	0.0764442	0.0651833	0.00960911	0.166214		dgcP	ATCATGCCTGCAAAGATTAAATAATCAGCATTTACCCGCCGTATCCTGGAGTTGTTCC	58	1
697	0.0736891	0.000354204	0.0185213	0.0154517	0.166789	0.693953	2.27773	0.845563		argT	TGCAAACACACAACACAATACACAACATAAAAAAGCCATTTTCACTTGAGGGTTATGT	58	7
698	0	0	0	0	0	0	0	0		yffO	CAATTCTTGCGAAAAATGGCAAAAATAACGGTATTTTTCATCATTTATTGGGGGTTTT	58	1
699	0	0	0	0	0	0	0	0		ffh	AAAATACTGATGATGTGTCGCGATTGCGGCCAACCGTTTCCACCCCAGGCGAGAGACA	58	1
700	0.212227	0.55157	0.929871	0.965872	0.932052	0.141077	0.0268794	0		csiD	ATGGCTACGAAATGAGCATCGCCATGTCACCCTACATCTCATAAGAGGATCGCTTCTG	58	4
701	0	0.0361886	0.022628	0.0253601	0.264644	0.525226	0.812804	1.25898		ilvC	ATTCAATCTCGCAAACGCGAACCGAACAATAAGAAGCACAACATCACGAGGAATCACC	58	8
702	0.0344738	0.0599116	0.1573	0.102398	0.0593493	0.000264017	0.0241243	0		hemL	TTGTTATGAATAACATAGAATAGCAGCCATTCACTTTTTCTACGAATCAGGAACCCTCC	59	3
703	0	0.000354204	0.00681032	0	0.00314453	0.010216	0.59811	3.55051		asnS	CCCCCCATTTACGGGTGGACAAGTGTTTATTTTTTCCGACTATTAACAGAGAGAATATT	59	8
704	0.020195	0.0477535	0.068639	0.0438335	0.0428919	0.0011086	0.000433934	0		pssA	CTTATGTCGTCTGCATTGCACAGAGGACCCTTCAATGAACAGAGAAGAAATGCACTGTG	59	3
705	0	0	0	0	0	0	0	0		trpS	TATAAATGACCTTCTGCCCGCATTAGGGCTTCCGCATAGCGAAAATCAGGAATCGAAAA	59	1
706	0	0	0	0	0	0	0	0		yiaK	AGTTTCGCATATTGAAATTTTAAGCCAAAAAAGCGATCAAAAAAACAAGGAAGCCTGGG	59	1
707	0.0350679	0.0673157	0.0684637	0.0321531	0.0164271	0.0217575	0	0		ampC	ATCGCCAATGTAAATCCGGCCCGCCTATGGCGGGCCGTTTTGTATGGAAACCAGACCCT	59	3
708	0	0	0	0	0.00053551	0.000327326	0.000327828	0		panD	GAATTTCCTCAAAGCAGGCATCGCCTGCTTCGTTAACGACAGGGTAGAAAGGTAGAAGTT	60	5
710	0.00353823	0.000354204	0.0483104	0	0.0174758	0.591846	2.19696	2.67413		tynA	GACTAAACCGCCCACAGAGCGCGGTTGCTAACAAGAACACAACATCTGACGAGGTTAATA	60	8
